# Supplementary material for: Harnessing solvation-guided engineering to enhance deep eutectic solvent resistance and thermostability in enzymes
Source: Royal Society of Chemistry journal article supplement (doi:10.1039/d3gc04933g), 2024-01-01
Supplement: d3gc04933g1.pdf [file d3gc04933g1.pdf]

## Supporting information

# Harnessing Solvation-Guided Engineering to Enhance Deep Eutectic Solvent Resistance and Thermostability in Enzymes

*Yijie Sheng<sup>1</sup>, Haiyang Cui<sup>2</sup>, Xinyue Wang<sup>1</sup>, Minghui Wang<sup>1</sup>, Ping Song<sup>1</sup>, He Huang<sup>1</sup>, Xiujuan Li<sup>1\*</sup>*

<sup>1</sup>College of Food Science and Pharmaceutical Engineering, Nanjing Normal University, Nanjing 210097, China.

<sup>2</sup>College of Life Sciences, Nanjing Normal University, Nanjing 210046, China.

\*Corresponding author: Xiujuan Li, Email: [lixiujuan@njnu.edu.cn](mailto:lixiujuan@njnu.edu.cn)

## Contents

|                                                                                                                                              |    |
|----------------------------------------------------------------------------------------------------------------------------------------------|----|
| Experimental.....                                                                                                                            | 6  |
| Preparation of deep eutectic solvent .....                                                                                                   | 6  |
| Generation of BSLA variants by mutagenesis.....                                                                                              | 6  |
| Protein expression and DES resistance measurement .....                                                                                      | 6  |
| The p-Nitrophenyl butyrate assay for measuring BSLA activity .....                                                                           | 7  |
| Determination of thermostability profiles .....                                                                                              | 7  |
| In silico generation of variants and stability analysis .....                                                                                | 8  |
| Molecular dynamics simulations .....                                                                                                         | 8  |
| Section S1. Analysis of the overall structure and solvation phenomena of BSLA WT<br>under different concentrations of DES .....              | 10 |
| Section S2. Analysis of interaction energy of BSLA in DESs .....                                                                             | 10 |
| Section S3. Analysis of the conformational change in BSLA active site.....                                                                   | 11 |
| Table S1. Primers used for solvation-guided engineering of BSLA. ....                                                                        | 12 |
| Table S2. Summary of calculated observables during MD simulation. ....                                                                       | 15 |
| Table S3. The solvation score of BSLA for each of surface amino acids in 30% (v/v)<br>ChCl:Acetamide (1:2).....                              | 16 |
| Table S4. The solvation score of BSLA for each of surface amino acids in 30% (v/v)<br>TBPB:EG (1:2). ....                                    | 17 |
| Table S5. The solvation score of BSLA for each of surface amino acids in 95% (v/v)<br>ChCl:EG (1:2).....                                     | 18 |
| Table S6. Stability analysis of the BSLA variants. ....                                                                                      | 19 |
| Figure S1. The 100 ns root mean square deviation (RMSD) of BSLA backbone with<br>respect to the initial structure as a function of time..... | 20 |
| Figure S2. Time averaged radius of gyration of BSLA determined from the last 40 ns<br>of MD simulations. ....                                | 21 |
| Figure S3. Time averaged Internal Hydrogen bond of BSLA determined from the last<br>40 ns of MD simulations.....                             | 22 |
| Figure S4. RMSF of BSLA residues. ....                                                                                                       | 23 |

|                                                                                                                                                                                             |    |
|---------------------------------------------------------------------------------------------------------------------------------------------------------------------------------------------|----|
| Figure S5. The time-averaged total solvent accessible surface area (SASA), hydrophobic SASA, and hydrophilic SASA of BSLA WT.....                                                           | 24 |
| Figure S6. DES layer around BSLA.....                                                                                                                                                       | 25 |
| Figure S7. H-bond acceptor layer around BSLA.....                                                                                                                                           | 26 |
| Figure S8. H-bond donor layer around BSLA.....                                                                                                                                              | 27 |
| Figure S9. Spatial distribution of DES and water molecules at the enzyme surface in 30% (v/v) TBPB:EG, and 95% (v/v) ChCl:EG. ....                                                          | 28 |
| Figure S10. The RDFs were calculated in ChCl: acetamide and TBPB: EG systems. ....                                                                                                          | 29 |
| Figure S11. The water number in substrate binding cleft (SBC) of BSLA. ....                                                                                                                 | 30 |
| Figure S12. The number of DES molecule in substrate binding cleft (SBC) of BSLA. ....                                                                                                       | 31 |
| Figure S13. The number of DES donor in substrate binding cleft (SBC) of BSLA.....                                                                                                           | 32 |
| Figure S14. Time averaged energy of protein with water molecules. ....                                                                                                                      | 33 |
| Figure S15. Time averaged energy of protein with DES molecules. ....                                                                                                                        | 34 |
| Figure S16. Time averaged energy of protein with DES acceptor. ....                                                                                                                         | 35 |
| Figure S17. Time averaged energy of protein with DES donor. ....                                                                                                                            | 36 |
| Figure S18. The interaction of residue (G175, G176, and R147) of BSLA with DES molecules (choline <sup>+</sup> , acetamide, tetrabutylphosphonium <sup>+</sup> , and ethylene glycol). .... | 37 |
| Figure S19. The number of water molecules around each amino acid type at the surface of BSLA WT in 100% water simulation system. ....                                                       | 38 |
| Figure S20. The number of DES molecules around each amino acid type at the surface of BSLA WT in 30% ChCl:Acetamide (1:2) simulation system. ....                                           | 39 |
| Figure S21. The number of water molecules around each amino acid type at the surface of BSLA WT in 30% ChCl:Acetamide (1:2) simulation system. ....                                         | 40 |
| Figure S22. The number of DES molecules around each amino acid type at the surface of BSLA WT in 100% (v/v) ChCl:Acetamide (1:2) simulation system.....                                     | 41 |
| Figure S23. The number of water molecules around each amino acid type at the surface of BSLA WT in 30% (v/v) TBPB:EG (1:2) simulation system. ....                                          | 42 |
| Figure S24. The number of DES molecules around each amino acid type at the surface of BSLA WT in 30% (v/v) TBPB:EG (1:2) simulation system. ....                                            | 43 |

|                                                                                                                                                                                                                                      |    |
|--------------------------------------------------------------------------------------------------------------------------------------------------------------------------------------------------------------------------------------|----|
| Figure S25. The number of DES molecules around each amino acid type at the surface of BSLA WT in 100% (v/v) TBPB:EG (1:2) simulation system. ....                                                                                    | 44 |
| Figure S26. The number of DES molecules around each amino acid type at the surface of BSLA WT in 95% (v/v) ChCl:EG (1:2) simulation system. ....                                                                                     | 45 |
| Figure S27. The number of water molecules around each amino acid type at the surface of BSLA WT in 95% (v/v) ChCl:EG (1:2) simulation system. ....                                                                                   | 46 |
| Figure S28. The number of DES molecules around each amino acid type at the surface of BSLA WT in 100% (v/v) ChCl:EG (1:2) simulation system. ....                                                                                    | 47 |
| Figure S29. The residual activity of BSLA variants at 50°C as a function of time. ....                                                                                                                                               | 48 |
| Figure S30. Root-mean-square deviation (RMSD) of the BSLA backbone with respect to the initial structure as a function of time in 30% (v/v) ChCl:Acetamide (1:2), 30% (v/v) TBPB:EG (1:2) and 95% (v/v) ChCl:EG (1:2). ....          | 49 |
| Figure S31. The time-averaged radius of gyration ( $R_g$ ) of BSLA variants in 30% (v/v) ChCl:Acetamide (1:2), 30% (v/v) TBPB:EG (1:2) and 95% (v/v) ChCl:EG (1:2). ....                                                             | 50 |
| Figure S32. The time-averaged SASA of BSLA variants. ....                                                                                                                                                                            | 51 |
| Figure S33. RMSF of BSLA variants in 30% (v/v) ChCl:Acetamide (1:2), 30% (v/v) TBPB:EG (1:2) and 95% (v/v) ChCl:EG (1:2) averaged over the last 40 ns of MD trajectories. ....                                                       | 52 |
| Figure S34. Local RMSF of BSLA variants in (a) 30% (v/v) TBPB:EG (1:2) and (b) 95% (v/v) ChCl:EG (1:2) averaged over the last 40 ns of MD trajectories. ....                                                                         | 53 |
| Figure S35. DES layer around BSLA variants in 30% (v/v) ChCl:Acetamide (1:2), 30% (v/v) TBPB:EG (1:2) and 95% (v/v) ChCl:EG (1:2) averaged over the last 40 ns of MD trajectories. ....                                              | 54 |
| Figure S36. Hydration shell around BSLA variants in 30% (v/v) ChCl:Acetamide (1:2), 30% (v/v) TBPB:EG (1:2) and 95% (v/v) ChCl:EG (1:2) averaged over the last 40 ns of MD trajectories. ....                                        | 55 |
| Figure S37. The number of DES molecule in substrate binding cleft (SBC) of BSLA variants in 30% (v/v) ChCl:Acetamide (1:2), 30% (v/v) TBPB:EG (1:2) and 95% (v/v) ChCl:EG (1:2) averaged over the last 40 ns of MD simulations. .... | 56 |

|                                                                                                                                                                                                                                                  |    |
|--------------------------------------------------------------------------------------------------------------------------------------------------------------------------------------------------------------------------------------------------|----|
| Figure S38. The number of increased water molecules in substrate binding cleft (SBC) of BSLA variants in 30% (v/v) ChCl:Acetamide (1:2), 30% (v/v) TBPB:EG (1:2) and 95% (v/v) ChCl:EG (1:2) averaged over the last 40 ns of MD simulations..... | 57 |
| Figure S39. Distance of active site of BSLA variants. ....                                                                                                                                                                                       | 58 |

## Experimental

### Preparation of deep eutectic solvent

Three DES (ChCl:Acetamide, TBPB:EG, ChCl:EG) were prepared by the heating method as previously reported.<sup>1</sup> The components were weighed in molar ratio and placed in a 50 mL conical flask. The mixture was heated in water bath up to 90 °C while being stirred until clear liquid was formed. The DES was formed in a clear liquid manner after heating, and was kept at room temperature for 24 hours before application. The preheated DES, heated to approximately 80°C, was utilized to generate DES solutions across a concentration range of 0– 100% (v/v) through gradual dilution with TEA buffer (pH 7.4, 50 mM).

### Generation of BSLA variants by mutagenesis

The previously constructed plasmid pET22b (+)-bsla wild type was used as a template to construct the single substitutions by the site-directed mutagenesis (SDM) method and recombinants were constructed by stepwise SDM.<sup>2</sup> The primers are shown in **Table S1**. The variants were verified by sequencing.

### Protein expression and DES resistance measurement

Chemically competent *Escherichia coli* DH5a and *E. coli* BL21-Gold (DE3) (Tsingke Biological Technology, China) were used as hosts for plasmids amplification and protein expression, respectively. The detailed description of the BSLA expression and the activity assay with *p*-Nitrophenyl butyrate (*p*NPB) in 96-well MTP was reported in our previous studies.<sup>3</sup> DES resistance of BSLA (wild type or variant) was evaluated as activity in the presence of DES divided by activity in the absence of DES.

$$\text{Residual activity} = \frac{\text{slope}_{WT/Variant \text{ in DES cosolvent}} - \text{slope}_{EV \text{ in DES cosolvent}}}{\text{slope}_{WT/Variant \text{ in buffer}} - \text{slope}_{EV \text{ in buffer}}}$$

$$Resistance\ fold = \frac{Residual\ activity_{variant}}{Residual\ activity_{BSLA}}$$

EV: empty vector. The concentration of DES (30% (v/v) ChCl:Acetamide, 30% (v/v) TBPB:EG, and 95% (v/v) ChCl:EG) resulting in a residual BSLA activity of 30-40% were chosen for the experiment to keep an effective screening window as suggested in previous studies.<sup>4</sup> The beneficial substitution was defined as a substitution that increases BSLA resistance fold to the respective DES.

### **The *p*-Nitrophenyl butyrate assay for measuring BSLA activity**

The residual activity of BSLA variant was measured at room temperature (25 °C) with *p*-Nitrophenyl butyrate (*p*NPB) as substrate at different concentrations of the three DESs. Microplate incubation was performed in LB<sub>Amp</sub> medium (150 µL per well) at 37 °C, 70% humidity, 900 rpm overnight, and 96-well expression cultivation was performed in modified autoinduction<sub>Amp</sub> medium at 16 h, 37 °C, 70% humidity, and 900 rpm. Cells were harvested by centrifugation at 5000 g for 30 min, followed by resuspended in buffer (pH 7.5, 25 mM Tris-Cl, 150 mM NaCl, 10 mM imidazole, and 0.5 mg/mL lysozyme) for lysis (1h, 37 °C). After centrifugation (5000 g for 20 min), the supernatant (5 µL) was added to 95 µL of assay buffer per well. The liberation of *p*-nitrophenyl cresol was documented by measuring A<sub>410nm</sub> within 8 min at room temperature with a microtiter plate reader (Biotek Synergy HI, USA) as in our previous study.<sup>3</sup>

### **Determination of thermostability profiles**

Residual activity was measured after incubation for 60 min of BSLA WT and variants at different temperatures from 30 to 100 °C using *p*NPB as substrate. The residual activity at room temperature (25 °C) was defined as 100%. Half-life(*t*<sub>1/2</sub>) was defined as the time required for enzyme variants to reach half of their initial value of residual

activity. To measure the  $t_{1/2}$  value, the activity was monitored by incubating the crude BSLA protein at 50 °C.

### **In silico generation of variants and stability analysis**

The crystal structure of BSLA (PDB ID: 1i6w, <sup>5</sup> Chain A, resolution 1.5 Å) was used as a model for the generation of variants containing single and multiple substitutions by the FoldX approach using the YASARA Plugin in YASARA structure version 17.4.17. The parameters of FoldX were established as 0.05 M for ionic strength, 298 K for temperature, and pH 7. <sup>6</sup> Meanwhile,  $\Delta\Delta G_{\text{fold}}$  ( $\Delta\Delta G_{\text{fold}} = \Delta G_{\text{fold, sub}} - \Delta G_{\text{fold, wt}}$ ) were calculated for evaluating the thermodynamic stability of the variants as previous reported. <sup>6</sup>

### **Molecular dynamics simulations**

MD simulations of BSLA WT and variants were performed using the GROMACS 2022 software package and GROMOS96(54a7) force field in various DESs. <sup>7</sup> GROMOS96(54a7) force field was applied for studying the DES-enzyme interaction previously.<sup>8</sup> The crystal structure of BSLA chain with PDB ID 1i6w was obtained from Protein Data Bank (3-181 amino acids). <sup>5</sup> The DES models were obtained from ATB (<https://atb.uq.edu.au>) <sup>9</sup> with the optimized parameters set matching GROMOS96(54a7) force field. Protein protonation was performed using the gmx self-contained tool gmx pdb2gmx, and the protein molecules were placed in a cubic box (12 Å from the edge of the box). Depending on the DES concentration, a corresponding number of ~140 choline cation ions, ~140 chloride anion ions and ~280 acetamide molecules in 30% (v/v) ChCl:Acetamide (1:2) system, ~468 choline cation ions, ~468 chloride anion ions and ~936 acetamide molecules in 100% (v/v) ChCl:Acetamide (1:2) system, ~56 tetrabutylphosphonium cation ions, ~56 bromine anion ions and ~112 ethylene glycol molecules in 30% (v/v) TBPB:EG (1:2) system, ~187 tetrabutylphosphonium cation

ions, ~187 bromine anion ions and ~374 ethylene glycol molecules in 100% (v/v) TBPB:EG (1:2) system, ~424 choline cation ions, ~424 chloride anion ions and ~848 ethylene glycols molecules in 95% (v/v) ChCl:EG (1:2) system, and ~446 choline cation ions, ~446 chloride anion ions and ~892 ethylene glycols molecules in 100% (v/v) ChCl:EG (1:2) system were added to the box. Afterwards, the rest of the system (30% (v/v) ChCl:Acetamide (1:2), 30% (v/v) TBPB:EG (1:2), 95% (v/v) ChCl:EG (1:2)) were filled with SPCE water model.<sup>10</sup> The charge of the system was neutralized with Na<sup>+</sup> and Cl<sup>-</sup>, and the net charge was zero in all setup systems.

Energy minimization was first performed using the steepest descent method to avoid the most unfavorable interactions.<sup>11</sup> As in our previous studies,<sup>3,12</sup> NVT tethering was performed at temperatures close to 298 K for 100 ps, followed by equilibration in NPT tethering for 100 ps with positional constraints on the protein structure. We performed three independent MD simulations for each BSLA-DES system with different atomic onset velocities to avoid artifacts (100 ns at 298 K with a time step of 1 bar at 1 ps). Coordinates, energies, and velocities were collected every 0.5 ns for the subsequent analysis with the GROMACS simulation package tool. The results were visualized and analyzed using PYMOL 2.5.2,<sup>13</sup> VMD 1.9.4,<sup>14</sup> and GROMACS tools.<sup>15</sup> We performed overall structural analysis of the protein (including root mean square deviation (RMSD), radius of gyration ( $R_g$ ), root mean square fluctuation (RMSF), Hydrogen Bond, solvent accessible surface area (SASA), and the distance transformation of the active site), solvation phenomenon analysis (including the overall hydration shell, DES layer, spatial distribution function (SDF), radial distribution function (RDF), and the number of water and DES molecules in active site), and interaction energy analysis of the protein with solvent molecules as a comprehensive assessment of the impact for DES cosolvent on BSLA.

**Section S1.** Analysis of the overall structure and solvation phenomena of BSLA WT under different concentrations of DES

The RMSD of 100ns (**Figure S1**) indicated that all simulated systems reached equilibrium in the last 40ns without large fluctuations. The time averaged radius of gyration ( $R_g$ ) (**Figure S2**) values of BSLA WT at different concentrations of DES were slightly reduced to those of 100% (v/v) water system. The number of internal hydrogen bonds (**Figure S3**) showed a different degree of increase. Meanwhile, the RMSF values for the individual residue of BSLA WT were shown in **Figure S4**, varying between 0.5 Å and 4.0 Å, and the value in DES systems was less than 100% (v/v) water system. The time-averaged total solvent accessible surface area (SASA), hydrophobic SASA, and hydrophilic SASA (**Figure S5**) of BSLA WT showed no remarkable changed trend. The DES layer (**Figure S6**), H-bond acceptor layer (**Figure S7**), and H-bond donor layer (**Figure S8**) around BSLA displayed the same tendency. The Spatial distribution (**Figure S9**) of DES and water molecules at BSLA surface revealed the stripping effect of DES on water molecules. The number of water molecule (**Figure S11**), DES molecule (**Figure S12**), and DES donor (**Figure S13**) in substrate binding cleft (SBC) demonstrated that DES molecule stripped water molecule from SBC.

**Section S2.** Analysis of interaction energy of BSLA in DESs

Furthermore, the non-bond binding free energies ( $\Delta G_{\text{non-bond}}$ ), electrostatic energy ( $\Delta E_{\text{elec}}$ ), and van der Waals energy ( $\Delta E_{\text{vdw}}$ ) were calculated to examine the strength of water/DES molecule binds to BSLA. Time averaged energy of protein with water molecules (**Figure S14**), protein with DES molecules (**Figure S15**), protein with DES acceptor (**Figure S16**), and protein with DES donor (**Figure S17**) were used to visualize the energy landscape between protein and DES molecules and water molecules. We discovered that  $\Delta G_{\text{non-bond}}$  between DES molecules and protein ranged from 1.8- to 4.5-folds of that between water molecules and protein in 30% (v/v) ChCl:Acetamide, 30% (v/v) TBPB:EG, and 95% (v/v) ChCl:EG. Interestingly, in the systems of 30% (v/v) ChCl:Acetamide and 100% (v/v) ChCl:EG, the DES acceptor occupied the major part of the DES-protein binding energy, whereas in the systems of 30% (v/v) TBPB:EG, 100% (v/v) TBPB:EG, 100% (v/v) ChCl:Acetamide, and 30% (v/v) ChCl:EG systems, the DES donor dominated the DES-protein binding energy. It indicated that different

systems as well as different concentrations of DES, would affect the interaction binding energies with protein. The interaction of residue of BSLA with DES molecules (**Figure S18**) indicated the formation of hydrogen bonding interaction forces between DES molecules and protein.

**Section S3.** Analysis of the conformational change in BSLA active site

As shown in **Figure S39**, we discovered that the distance among catalytic triad in the active site of all BSLA recombinant in ChCl:Acetamide was increased compared to WT, but not consistent conformational changes were shown in the other two DES systems.

**Table S1.** Primers used for solvation-guided engineering of BSLA.

| Name                | 5 --> 3 sequence                         |
|---------------------|------------------------------------------|
| H3L Forward Primer  | GGATATCGCTGAACTGAATCCAGTCGTTAT           |
| H3L Reverse Primer  | ATAACGACTGGATT <u>CAG</u> TTTCAGCGATATCC |
| H3V Forward Primer  | GGATATCGCTGAAGTTAATCCAGTCGTTAT           |
| H3V Reverse Primer  | ATAACGACTGGATT <u>AACT</u> TCAGCGATATCC  |
| R33L Forward Primer | CAGGGCTGGTCGCTGGACAAGCTGTAT              |
| R33L Reverse Primer | ATACAGCTTGTC <u>CAG</u> CGACCAGCCCTG     |
| R33V Forward Primer | CAGGGCTGGTCGTTGACAAGCTGTAT               |
| R33V Reverse Primer | ATACAGCTTGTC <u>AA</u> CCGACCAGCCCTG     |
| D34H Forward Primer | GGCTGGTCGCGGCATAAGCTGTATGCA              |
| D34H Reverse Primer | TGCATACAGCTTATGCGCGACCAGCC               |
| D34Y Forward Primer | GGCTGGTCGCGGTATAAGCTGTATGCA              |
| D34Y Reverse Primer | TGCATACAGCTTATACCGCGACCAGCC              |
| D40H Forward Primer | AGCTGTATGCAGTTCACTTTTGGGACAAGAC          |
| D40H Reverse Primer | GTCTTGTCCTCCAAAAGTGAAGTGCATACAGCT        |
| D40Y Forward Primer | AGCTGTATGCAGTTTATTTTGGGACAAGAC           |
| D40Y Reverse Primer | GTCTTGTCCTCCAAAATAAAGTGCATACAGCT         |
| D43H Forward Primer | AGTTGATTTTGGCATAAGACAGGCACAA             |
| D43H Reverse Primer | TTGTGCCTGTCTTATGCCAAAAATCAACT            |
| D43Y Forward Primer | AGTTGATTTTGGTATAAGACAGGCACAA             |
| D43Y Reverse Primer | TTGTGCCTGTCTTATACCAAAAATCAACT            |
| R57L Forward Primer | ACCGGTATTATCACTGTTTGTGCAAAAGG            |
| R57L Reverse Primer | CCTTTTGCACAAACAGTGATAATACCGGT            |
| R57V Forward Primer | ACCGGTATTATCAGTTTTTGTGCAAAAGG            |
| R57V Reverse Primer | CCTTTTGCACAAA <u>AACT</u> GATAATACCGGT   |
| D64H Forward Primer | GCAAAAGGTTTTACACGAAACGGGTGCG             |
| D64H Reverse Primer | CGCACCCGTTTCGTGTAAAACCTTTTGC             |
| D64Y Forward Primer | GCAAAAGGTTTTATACGAAACGGGTGCG             |
| D64Y Reverse Primer | CGCACCCGTTTCGTATAAAAACCTTTTGC            |
| E65H Forward Primer | AAGGTTTTAGATCATACGGGTGCGAAAAAAG          |
| E65H Reverse Primer | CTTTTTTCGCACCCGTATGATCTAAAACCTT          |
| E65Y Forward Primer | AAGGTTTTAGATTATACGGGTGCGAAAAAAG          |

---

|                      |                                              |
|----------------------|----------------------------------------------|
| E65Y Reverse Primer  | CTTTTTTCGCACCCGTATAATCTAAACCTT               |
| D91H Forward Primer  | CTACATAAAAAATCTG <u>CAT</u> GGCGGAAATAAAGTTG |
| D91H Reverse Primer  | CAACTTTATTTCCGCC <u>ATG</u> CAGATTTTTTATGTAG |
| D91Y Forward Primer  | CTACATAAAAAATCTG <u>TAT</u> GGCGGAAATAAAGTTG |
| D91Y Reverse Primer  | CAACTTTATTTCCGCC <u>ATA</u> CAGATTTTTTATGTAG |
| R107L Forward Primer | GGCGGCGCGAAC <u>CTG</u> TTGACGACAGGC         |
| R107L Reverse Primer | GCCTGTCTGTCAA <u>CAG</u> GTCGCGCCGCC         |
| R107V Forward Primer | GGCGGCGCGAAC <u>GTT</u> TTGACGACAGGC         |
| R107V Reverse Primer | GCCTGTCTGTCAA <u>AAC</u> GTCGCGCCGCC         |
| D118H Forward Primer | CGCTTCCGGGAACAC <u>ACCC</u> AAATCAAAAGAT     |
| D118H Reverse Primer | ATCTTTTGATTTGGG <u>TGT</u> GTTCCCGGAAGCG     |
| D118Y Forward Primer | CGCTTCCGGGAACAT <u>ATC</u> CAAATCAAAAGAT     |
| D118Y Reverse Primer | ATCTTTTGATTTGG <u>ATA</u> TGTTCCCGGAAGCG     |
| D133H Forward Primer | TTTACAGCAGTGCC <u>CAC</u> ATGATTGTCATGAA     |
| D133H Reverse Primer | TTCATGACAATCATG <u>TGG</u> GCACGTGCTGTAAA    |
| D133Y Forward Primer | TTTACAGCAGTGCC <u>TAT</u> ATGATTGTCATGAA     |
| D133Y Reverse Primer | TTCATGACAATCAT <u>ATAG</u> GCACGTGCTGTAAA    |
| R142L Forward Primer | CATGAATTACTTATC <u>ACTG</u> TTAGATGGTGCTAGAA |
| R142L Reverse Primer | TTCTAGCACCATCTAA <u>CAG</u> TGATAAGTAATTCATG |
| R142V Forward Primer | CATGAATTACTTATC <u>AGTT</u> TTAGATGGTGCTAGAA |
| R142V Reverse Primer | TTCTAGCACCATCTAA <u>AACT</u> GATAAGTAATTCATG |
| D144H Forward Primer | TACTTATCAAGATTAC <u>ACG</u> GTGCTAGAAACGTTCA |
| D144H Reverse Primer | TGAACGTTTCTAGCACCG <u>TGT</u> AATCTTGATAAGTA |
| D144Y Forward Primer | TACTTATCAAGATTAT <u>ATG</u> GTGCTAGAAACGTTCA |
| D144Y Reverse Primer | TGAACGTTTCTAGCAC <u>ATA</u> TAATCTTGATAAGTA  |
| R147L Forward Primer | GATTAGATGGTGCTC <u>TGA</u> ACGTTCAAATCCA     |
| R147L Reverse Primer | TGGATTTGAACGTT <u>CAG</u> AGCACCATCTAATC     |
| R147V Forward Primer | GATTAGATGGTGCTG <u>TTA</u> ACGTTCAAATCCA     |
| R147V Reverse Primer | TGGATTTGAACGTT <u>AAC</u> AGCACCATCTAATC     |
| H152L Forward Primer | AACGTTCAAATC <u>CTG</u> GGCGTTGGACAC         |
| H152L Reverse Primer | GTGTCCAACGCC <u>CAG</u> GATTTGAACGTT         |
| H152V Forward Primer | AACGTTCAAATC <u>GTT</u> GGCGTTGGACAC         |
| H152V Reverse Primer | GTGTCCAACGCC <u>AAC</u> GATTTGAACGTT         |

---

---

|                      |                                       |
|----------------------|---------------------------------------|
| H156L Forward Primer | CATGGCGTTGG <u>ACTG</u> ATCGGCCTTCTG  |
| H156L Reverse Primer | CAGAAGGCCGAT <u>CAGT</u> CCAACGCCATG  |
| H156V Forward Primer | CATGGCGTTGGAG <u>TTAT</u> CGGCCTTCTG  |
| H156V Reverse Primer | CAGAAGGCCGATA <u>AACT</u> CCAACGCCATG |
| E171H Forward Primer | AGCCTGATTAAAC <u>ACG</u> GGCTGAACGGC  |
| E171H Reverse Primer | GCCGTTCAGCCC <u>GTG</u> TTTAATCAGGCT  |
| E171Y Forward Primer | AGCCTGATTAAAT <u>ATG</u> GGCTGAACGGC  |
| E171Y Reverse Primer | GCCGTTCAGCCC <u>CATAT</u> TTAATCAGGCT |

---

**Table S2.** Summary of calculated observables during MD simulation.

| Descriptor                        | Location        | Observables                                      | Results    | Determinant |
|-----------------------------------|-----------------|--------------------------------------------------|------------|-------------|
| Geometrical property              | Overall protein | 100 ns RMSD                                      | Figure S1  | no          |
|                                   |                 | Time-averaged RMSD                               | Figure 2a  | no          |
|                                   |                 | Time-averaged R <sub>g</sub>                     | Figure S2  | no          |
|                                   |                 | Internal H-bond                                  | Figure S3  | no          |
|                                   |                 | RMSF                                             | Figure S4  | no          |
|                                   |                 | Total SASA                                       | Figure S5  | no          |
|                                   |                 | Hydrophobic SASA                                 | Figure S5  | no          |
|                                   |                 | Hydrophilic SASA                                 | Figure S5  | no          |
|                                   | Active site     | Distance of Ser77-OG⋯Asp133-OD1                  | Figure 2b  | no          |
|                                   |                 | Distance of Ser77-OG⋯His156-ND1                  | Figure 2b  | no          |
| Distance of Asp133-OD1⋯His156-ND1 |                 | Figure 2b                                        | no         |             |
| Solvation phenomenon              | Overall protein | Hydration shell                                  | Figure 2c  | yes         |
|                                   |                 | DES layer                                        | Figure S6  | yes         |
|                                   |                 | H-bond acceptor layer                            | Figure S7  | yes         |
|                                   |                 | H-bond donor layer                               | Figure S8  | yes         |
|                                   |                 | SDF                                              | Figure S9  | yes         |
|                                   |                 | RDF                                              | Figure S10 | no          |
|                                   | Active site     | Number of water molecule                         | Figure S11 | yes         |
|                                   |                 | Number of DES molecule                           | Figure S12 | yes         |
|                                   |                 | Number of DES acceptor                           | Figure 2d  | yes         |
|                                   |                 | Number of DES donor                              | Figure S13 | yes         |
| Interaction energy                | Overall protein | $\Delta E_{\text{elec}}$ (BSLA-water)            | Figure S14 | no          |
|                                   |                 | $\Delta E_{\text{vdW}}$ (BSLA-water)             | Figure S14 | no          |
|                                   |                 | $\Delta G_{\text{non-bond}}$ (BSLA-water)        | Figure S14 | no          |
|                                   |                 | $\Delta E_{\text{elec}}$ (BSLA-DES)              | Figure S15 | no          |
|                                   |                 | $\Delta E_{\text{vdW}}$ (BSLA-DES)               | Figure S15 | no          |
|                                   |                 | $\Delta G_{\text{non-bond}}$ (BSLA-DES)          | Figure S15 | no          |
|                                   |                 | $\Delta E_{\text{elec}}$ (BSLA-DES acceptor)     | Figure S16 | no          |
|                                   |                 | $\Delta E_{\text{vdW}}$ (BSLA-DES acceptor)      | Figure S16 | no          |
|                                   |                 | $\Delta G_{\text{non-bond}}$ (BSLA-DES acceptor) | Figure S16 | no          |
|                                   |                 | $\Delta E_{\text{elec}}$ (BSLA-DES donor)        | Figure S17 | no          |
|                                   |                 | $\Delta E_{\text{vdW}}$ (BSLA-DES donor)         | Figure S17 | no          |
|                                   |                 | $\Delta G_{\text{non-bond}}$ (BSLA-DES donor)    | Figure S17 | no          |
|                                   |                 | In total                                         |            | 33          |



**Table S3.** The solvation score of BSLA for each of surface amino acids in 30% (v/v) ChCl:Acetamide (1:2).

| 30% (v/v) ChCl:Acetamide (1:2) | score |
|--------------------------------|-------|
| E                              | -31.4 |
| D                              | -15.4 |
| W                              | -11.1 |
| N                              | -2.9  |
| P                              | -1.1  |
| A                              | -1.0  |
| V                              | -0.9  |
| G                              | -0.3  |
| L                              | -0.2  |
| T                              | 0.0   |
| M                              | 1.4   |
| F                              | 1.5   |
| S                              | 2.5   |
| I                              | 2.8   |
| Q                              | 3.0   |
| R                              | 4.3   |
| K                              | 4.6   |
| H                              | 7.0   |
| Y                              | 7.5   |

**Table S4.** The solvation score of BSLA for each of surface amino acids in 30% (v/v) TBPB:EG (1:2).

| 30% (v/v) TBPB: EG (1:2) | score |
|--------------------------|-------|
| E                        | -20.4 |
| D                        | -12.2 |
| W                        | -6.2  |
| K                        | -5.9  |
| N                        | -3.5  |
| A                        | -2.5  |
| P                        | -2.5  |
| Q                        | -2.2  |
| R                        | -1.8  |
| L                        | -1.6  |
| G                        | -0.8  |
| S                        | -0.5  |
| V                        | -0.2  |
| F                        | -0.1  |
| T                        | -0.1  |
| M                        | 2.0   |
| I                        | 2.2   |
| Y                        | 3.2   |
| H                        | 4.7   |

**Table S5.** The solvation score of BSLA for each of surface amino acids in 95% (v/v) ChCl:EG (1:2).

| 95% (v/v) ChCl: EG (1:2) | score |
|--------------------------|-------|
| R                        | -19.0 |
| H                        | -17.9 |
| W                        | -16.4 |
| N                        | -15.5 |
| Q                        | -15.3 |
| D                        | -15.3 |
| K                        | -13.9 |
| Y                        | -12.7 |
| F                        | -12.3 |
| E                        | -10.4 |
| S                        | -9.0  |
| T                        | -7.8  |
| M                        | -6.7  |
| P                        | -5.3  |
| A                        | -5.0  |
| G                        | -4.9  |
| I                        | -4.5  |
| V                        | -4.3  |
| L                        | -4.1  |

**Table S6.** Stability analysis of the BSLA variants.

| BSLA variant     | Sum $\Delta\Delta G_{\text{fold}}$ of substitutions<br>(kcal/mol) | Overall $\Delta\Delta G_{\text{fold}}$ of recombinant<br>(kcal/mol) |
|------------------|-------------------------------------------------------------------|---------------------------------------------------------------------|
| D64H/R142L       | -0.78                                                             | -0.69                                                               |
| R107L/E171Y      | -0.68                                                             | -1.42                                                               |
| D64H/R107L/E171Y | -1.31                                                             | -1.92                                                               |
| D64H/R142L/E171Y | -1.31                                                             | -1.19                                                               |

The command (Mutate residue) was applied to calculate the  $\Delta\Delta G_{\text{fold}}$  of every single substitution.  $\text{Sum } \Delta\Delta G_{\text{fold}} = \Delta\Delta G_{\text{fold, sub1}} + \Delta\Delta G_{\text{fold, sub2}} + \Delta\Delta G_{\text{fold, subX}}$ . The command (Mutate multiple residues) was applied to calculate the overall  $\Delta\Delta G_{\text{fold}}$  of recombinants. Due to the accuracy of the FoldX method in the prediction of relative folding free energies is reported to be 0.46 kcal/mol, and we defined that the synergistic effect occurs when  $(\text{Sum of } \Delta\Delta G_{\text{fold}} - \text{Overall } \Delta\Delta G_{\text{fold}}) > 0.46$  kcal/mol. The  $\Delta\Delta G_{\text{fold}}$  calculations were performed three times and averaged for each variant overall  $\Delta\Delta G_{\text{fold}}$  of recombinants.

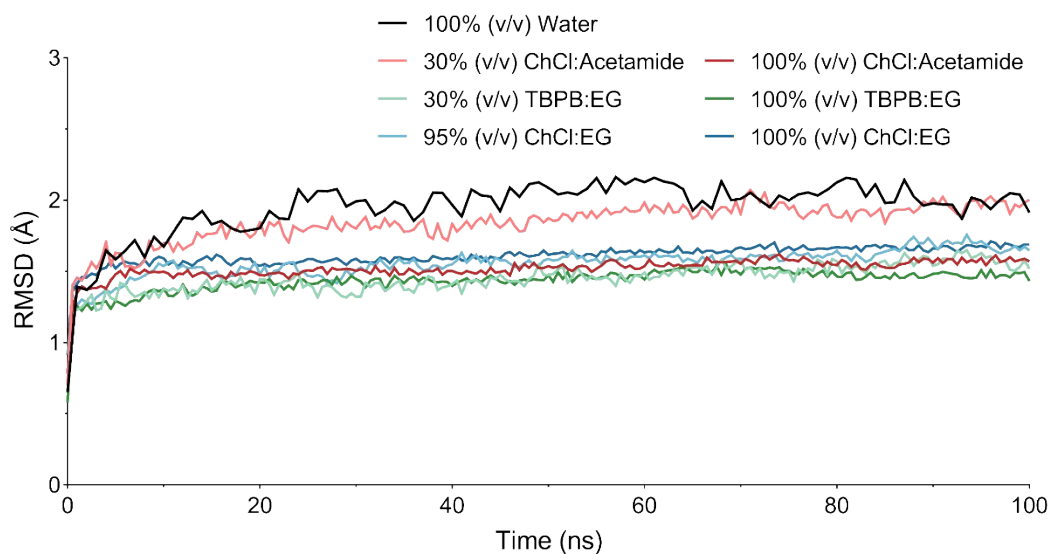

**Figure S1.** The 100 ns root mean square deviation (RMSD) of BSLA backbone with respect to the initial structure as a function of time. All DES systems 30% (v/v) ChCl: Acetamide, 100% (v/v) ChCl:Acetamide, 30% (v/v) TBPB:EG, 100% (v/v) TBPB:EG, 95% (v/v) ChCl:EG and 100% (v/v) ChCl:EG have a molar ratio of 1:2. The data averaged from three independent runs.

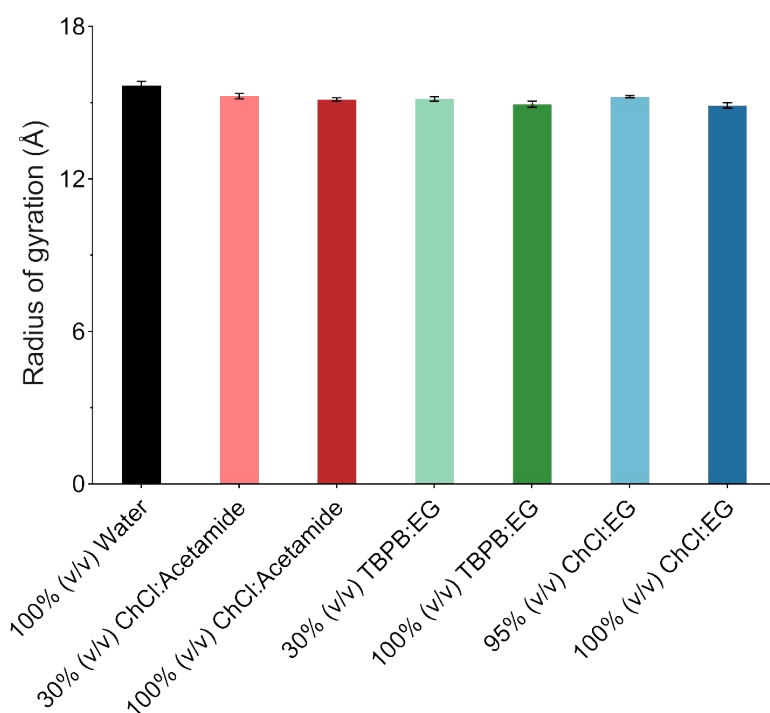

**Figure S2.** Time averaged radius of gyration of BSLA determined from the last 40 ns of MD simulations. All DES systems 30% (v/v) ChCl:Acetamide, 100% (v/v) ChCl:Acetamide, 30% (v/v) TBPB:EG, 100% (v/v) TBPB:EG, 95% (v/v) ChCl:EG and 100% (v/v) ChCl:EG have a molar ratio of 1:2. Error bars correspond to the standard deviation of three independent MD runs.

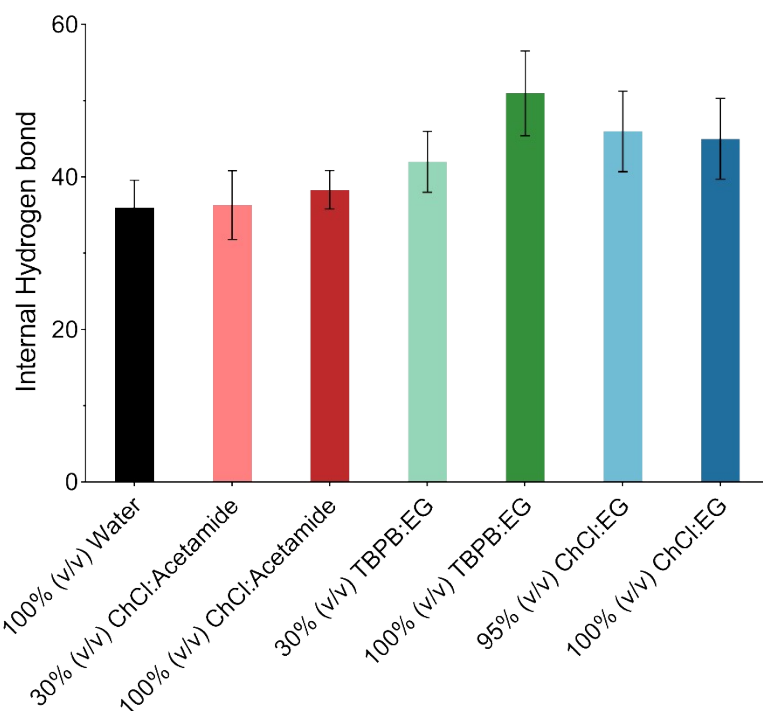

**Figure S3.** Time averaged Internal Hydrogen bond of BSLA determined from the last 40 ns of MD simulations. All DES systems 30% (v/v) ChCl:Acetamide, 100% (v/v) ChCl:Acetamide, 30% (v/v) TBPB:EG, 100% (v/v) TBPB:EG, 95% (v/v) ChCl:EG and 100% (v/v) ChCl:EG have a molar ratio of 1:2. Error bars correspond to the standard deviation of three independent MD runs.

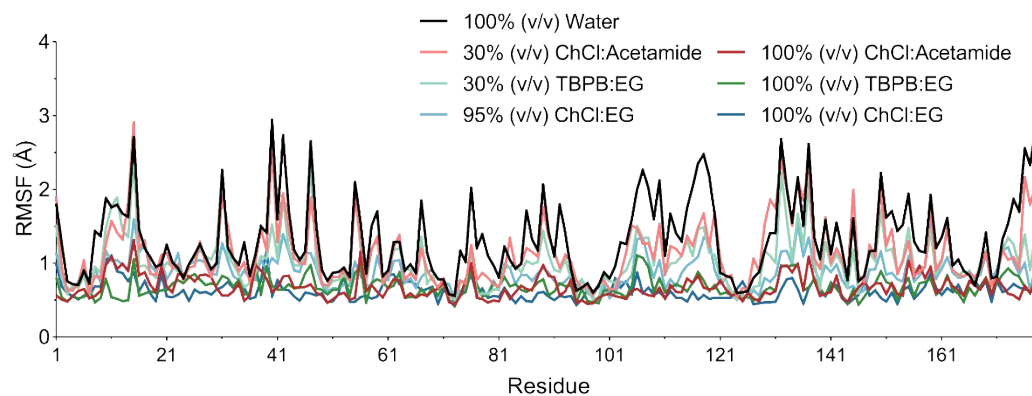

**Figure S4.** RMSF of BSLA residues. All DES systems 30% (v/v) ChCl:Acetamide, 100% (v/v) ChCl:Acetamide, 30% (v/v) TBPB:EG, 100% (v/v) TBPB:EG, 95% (v/v) ChCl:EG and 100% (v/v) ChCl:EG have a molar ratio of 1:2. The data averaged from three independent runs.

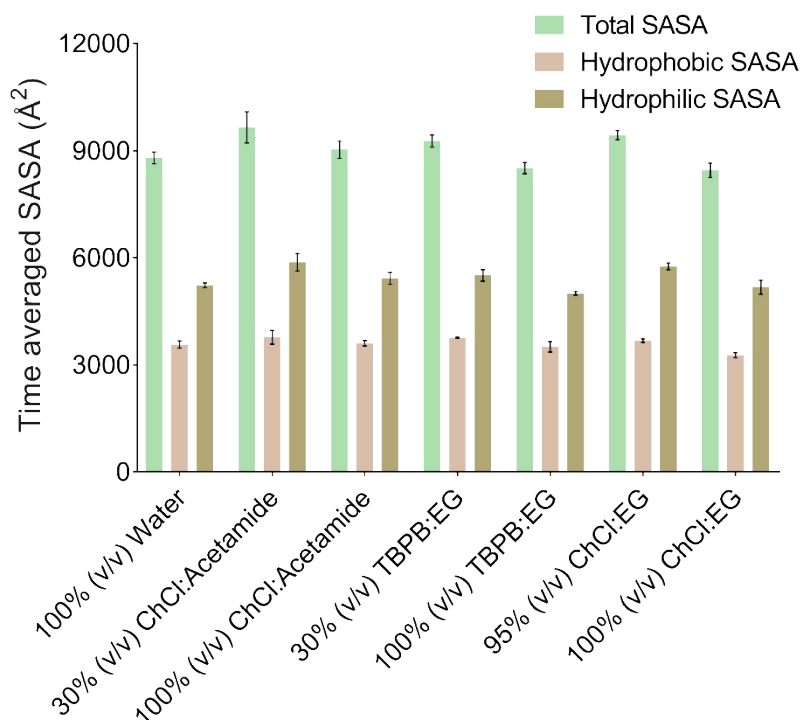

**Figure S5.** The time-averaged total solvent accessible surface area (SASA), hydrophobic SASA, and hydrophilic SASA of BSLA WT. All DES systems 30% (v/v) ChCl:Acetamide, 100% (v/v) ChCl:Acetamide, 30% (v/v) TBPB:EG, 100% (v/v) TBPB:EG, 95% (v/v) ChCl:EG and 100% (v/v) ChCl:EG have a molar ratio of 1:2. The data averaged from three independent runs. Error bars correspond to the standard deviation of three independent MD runs.

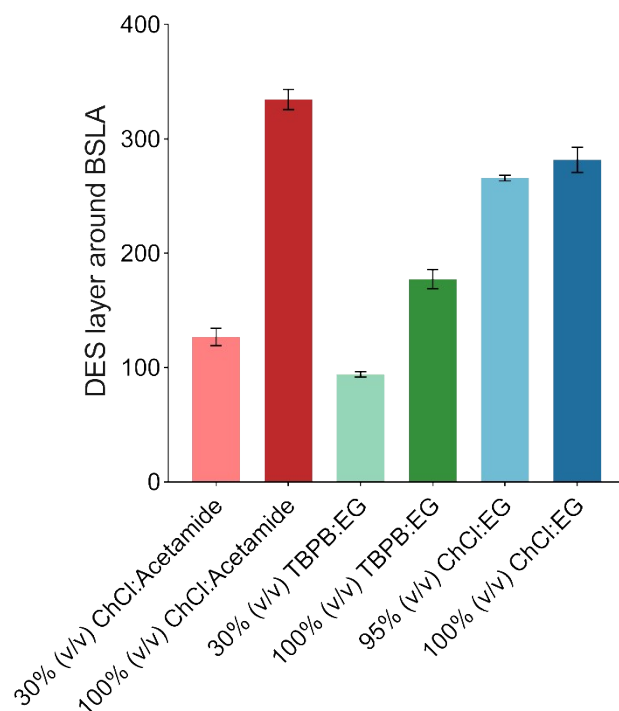

**Figure S6.** DES layer around BSLA. All DES systems 30% (v/v) ChCl:Acetamide, 100% (v/v) ChCl:Acetamide, 30% (v/v) TBPB:EG, 100% (v/v) TBPB:EG, 95% (v/v) ChCl:EG and 100% (v/v) ChCl:EG have a molar ratio of 1:2. The data averaged from three independent runs. Error bars correspond to the standard deviation of three independent MD runs.

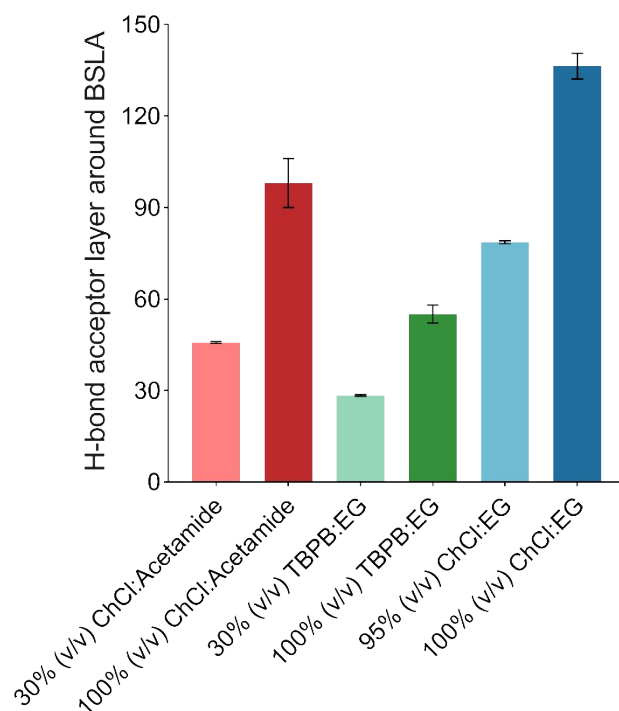

**Figure S7.** H-bond acceptor layer around BSLA. All DES systems 30% (v/v) ChCl:Acetamide, 100% (v/v) ChCl:Acetamide, 30% (v/v) TBPB:EG, 100% (v/v) TBPB:EG, 95% (v/v) ChCl:EG and 100% (v/v) ChCl:EG have a molar ratio of 1:2. The data averaged from three independent runs. Error bars correspond to the standard deviation of three independent MD runs.

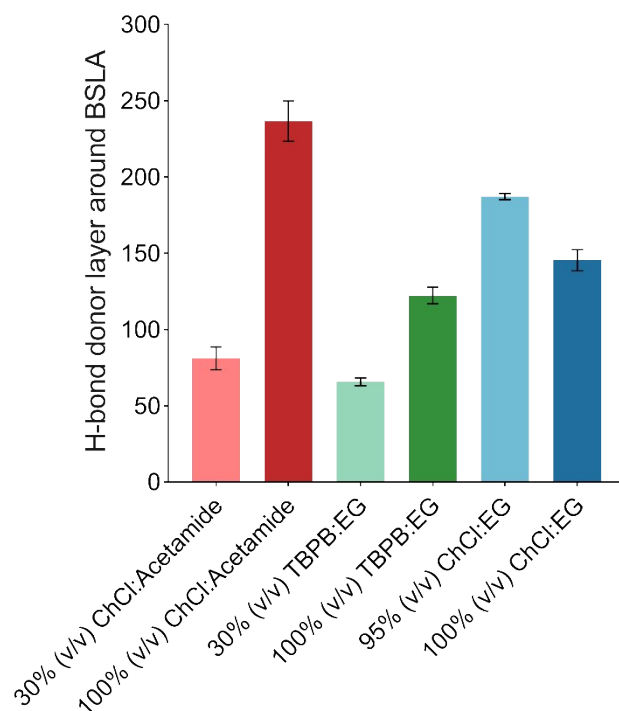

**Figure S8.** H-bond donor layer around BSLA. All DES systems 30% (v/v) ChCl:Acetamide, 100% (v/v) ChCl:Acetamide, 30% (v/v) TBPB:EG, 100% (v/v) TBPB:EG, 95% (v/v) ChCl:EG and 100% (v/v) ChCl:EG have a molar ratio of 1:2. The data averaged from three independent runs. Error bars correspond to the standard deviation of three independent MD runs.

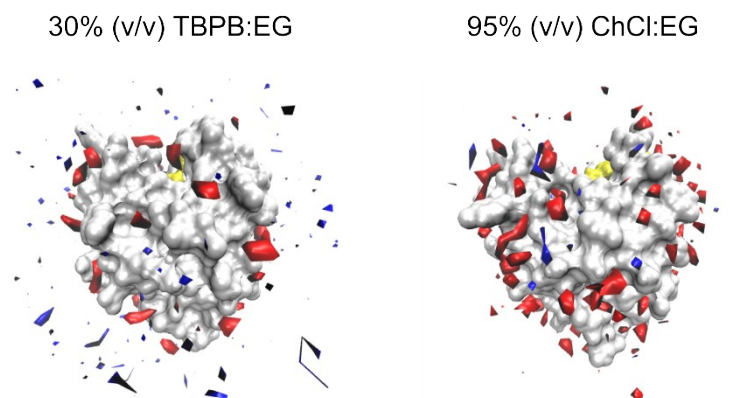

**Figure S9.** Spatial distribution of DES and water molecules at the enzyme surface in 30% (v/v) TBPB:EG, and 95% (v/v) ChCl:EG. The BSLA surface is shown in gray, the DES molecules are in red, and the water molecules are in blue. The active sites in BSLA (Ser 77, Asp 133, and His 156) are shown in yellow.

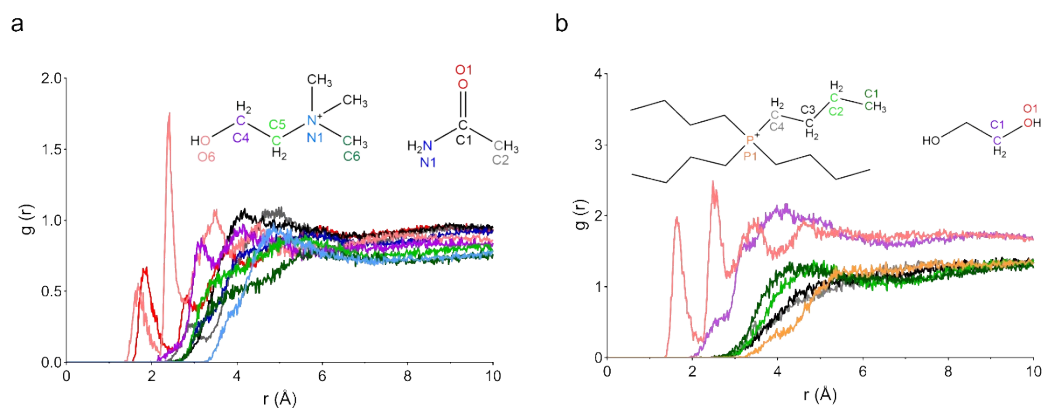

**Figure S10.** The RDFs were calculated in ChCl: acetamide and TBPB: EG systems. The choline<sup>+</sup>-N1, choline<sup>+</sup>-C4, choline<sup>+</sup>-C5, choline<sup>+</sup>-C6, choline<sup>+</sup>-O6, acetamide-N1, acetamide-O1, tetrabutylphosphonium<sup>+</sup>-P1, tetrabutylphosphonium<sup>+</sup>-C1, tetrabutylphosphonium<sup>+</sup>-P1, ethylene glycol-O1, and ethylene glycol-C1 around the BSLA residues, respectively.

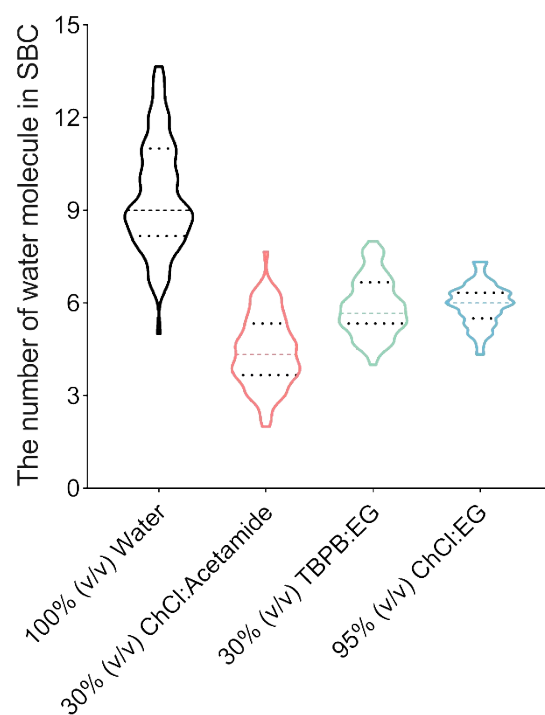

**Figure S11.** The water number in substrate binding cleft (SBC) of BSLA. All DES systems 30% (v/v) ChCl:Acetamide, 30% (v/v) TBPB:EG, and 95% (v/v) ChCl:EG have a molar ratio of 1:2. The data averaged from three independent runs.

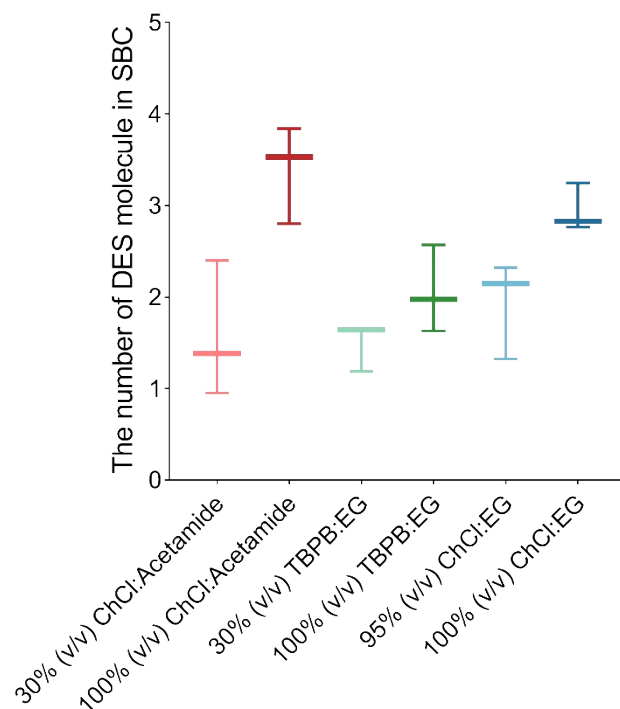

**Figure S12.** The number of DES molecule in substrate binding cleft (SBC) of BSLA. All DES systems 30% (v/v) ChCl:Acetamide, 100% (v/v) ChCl:Acetamide, 30% (v/v) TBPB:EG, 100% (v/v) TBPB:EG, 95% (v/v) ChCl:EG and 100% (v/v) ChCl:EG have a molar ratio of 1:2. The data averaged from three independent runs.

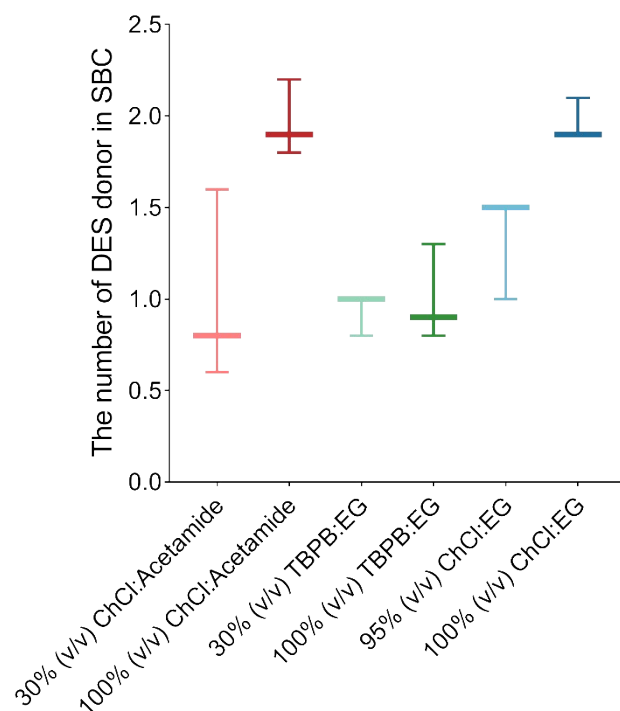

**Figure S13.** The number of DES donor in substrate binding cleft (SBC) of BSLA. All DES systems 30% (v/v) ChCl:Acetamide, 100% (v/v) ChCl:Acetamide, 30% (v/v) TBPB:EG, 100% (v/v) TBPB:EG, 95% (v/v) ChCl:EG and 100% (v/v) ChCl:EG have a molar ratio of 1:2. The data averaged from three independent runs.

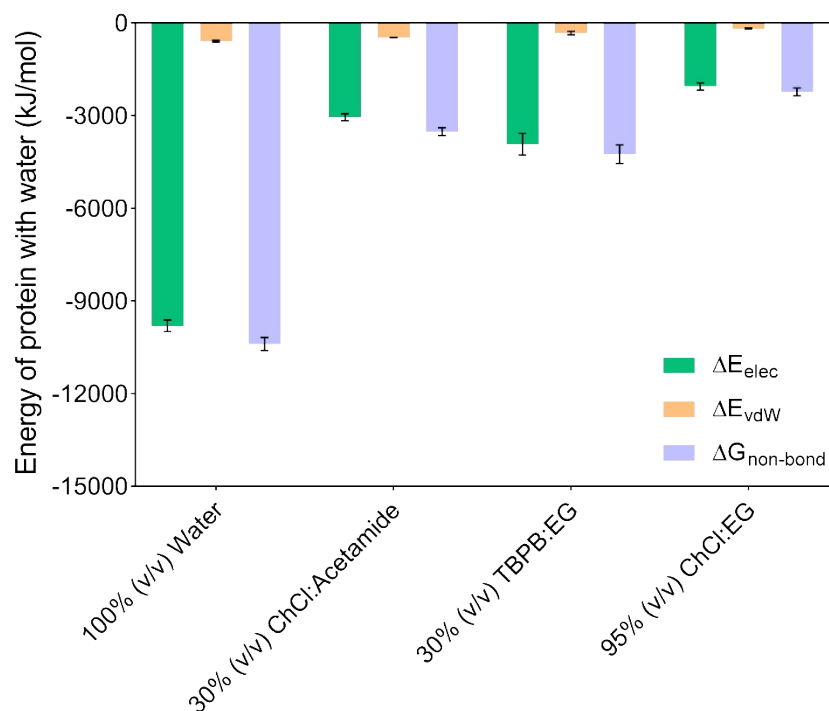

**Figure S14.** Time averaged energy of protein with water molecules. All DES systems 30% (v/v) ChCl:Acetamide, 30% (v/v) TBPB:EG, and 95% (v/v) ChCl:EG have a molar ratio of 1:2. The data averaged from three independent runs. The error bar was calculated from three independent MD runs.  $\Delta E_{\text{elec}}$ : electrostatic energy.  $\Delta E_{\text{vdW}}$ : van der Waals.  $\Delta G_{\text{nonbond}}$ : the non-bond binding.  $\Delta G_{\text{nonbond}} = \Delta E_{\text{elec}} + \Delta E_{\text{vdW}}$ .

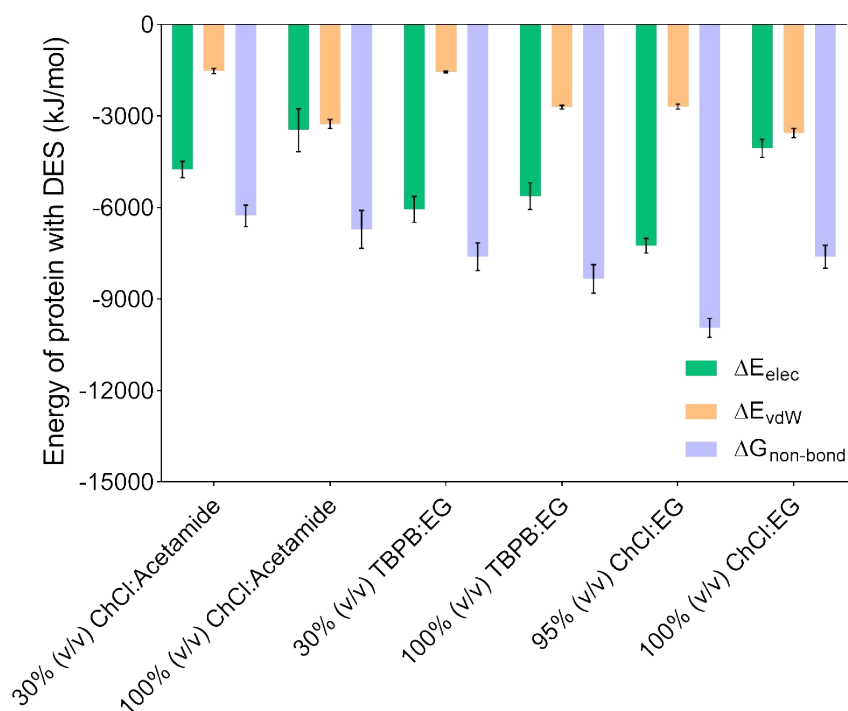

**Figure S15.** Time averaged energy of protein with DES molecules. All DES systems 30% (v/v) ChCl:Acetamide, 100% (v/v) ChCl:Acetamide, 30% (v/v) TBPB:EG, 100% (v/v) TBPB:EG, 95% (v/v) ChCl:EG and 100% (v/v) ChCl:EG have a molar ratio of 1:2. The data averaged from three independent runs. The error bar was calculated from three independent MD runs.  $\Delta E_{elec}$ : electrostatic energy.  $\Delta E_{vdW}$ : van der Waals energy.  $\Delta G_{nonbond}$ : the non-bond binding free energy.  $\Delta G_{nonbond} = \Delta E_{elec} + \Delta E_{vdW}$ .

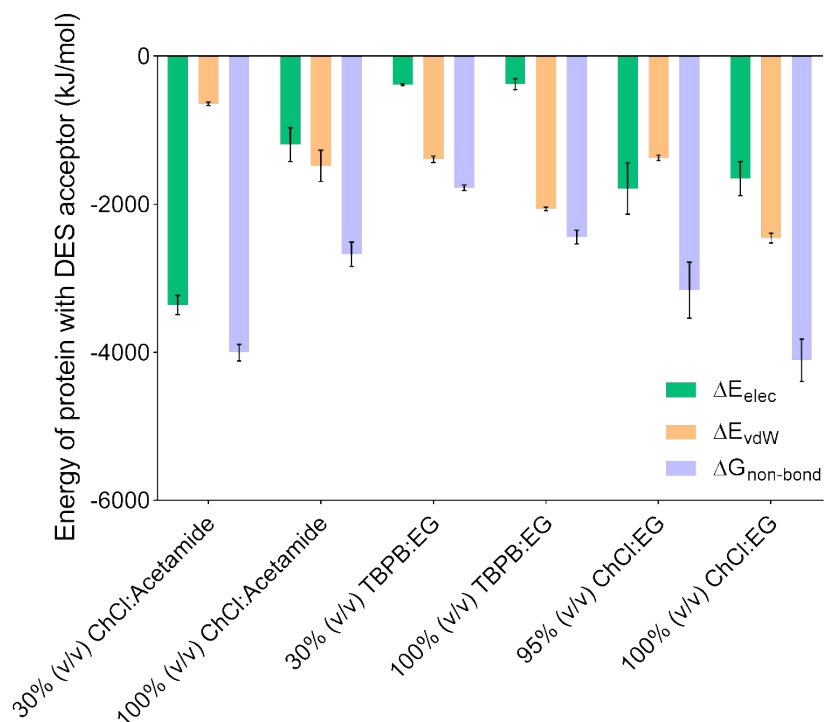

**Figure S16.** Time averaged energy of protein with DES acceptor. All DES systems 30% (v/v) ChCl:Acetamide, 100% (v/v) ChCl:Acetamide, 30% (v/v) TBPB:EG, 100% (v/v) TBPB:EG, 95% (v/v) ChCl:EG and 100% (v/v) ChCl:EG have a molar ratio of 1:2. The data averaged from three independent runs. The error bar was calculated from three independent MD runs.  $\Delta E_{elec}$ : electrostatic energy.  $\Delta E_{vdW}$ : van der Waals energy.  $\Delta G_{nonbond}$ : the non-bond binding free energy.  $\Delta G_{nonbond} = \Delta E_{elec} + \Delta E_{vdW}$ .

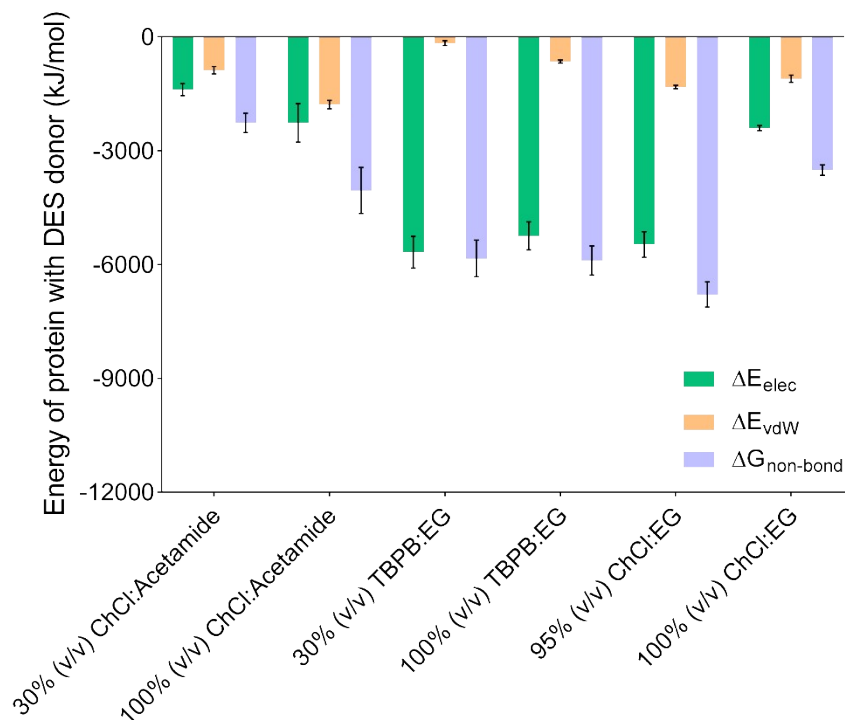

**Figure S17.** Time averaged energy of protein with DES donor. All DES systems 30% (v/v) ChCl:Acetamide, 100% (v/v) ChCl:Acetamide, 30% (v/v) TBPB:EG, 100% (v/v) TBPB:EG, 95% (v/v) ChCl:EG and 100% (v/v) ChCl:EG have a molar ratio of 1:2. The data averaged from three independent runs. The error bar was calculated from three independent MD runs.  $\Delta E_{elec}$ : electrostatic energy.  $\Delta E_{vdW}$ : van der Waals energy.  $\Delta G_{nonbond}$ : the non-bond binding free energy.  $\Delta G_{nonbond} = \Delta E_{elec} + \Delta E_{vdW}$ .

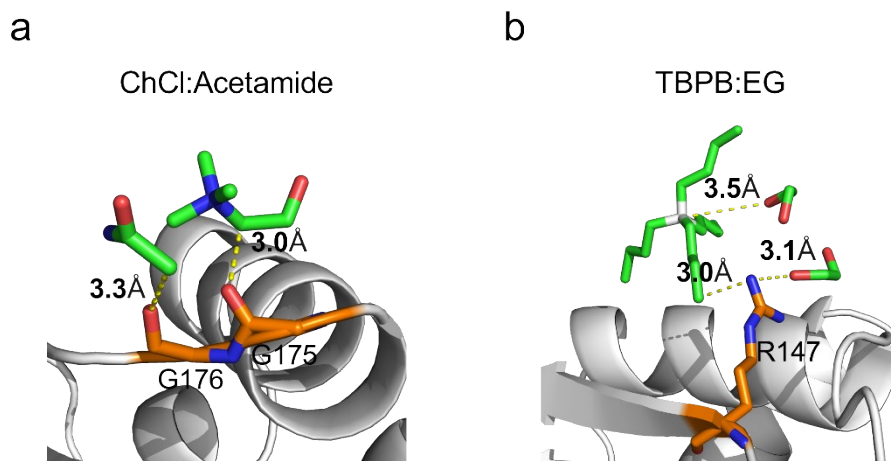

**Figure S18.** The interaction of residue (G175, G176, and R147) of BSLA with DES molecules (choline<sup>+</sup>, acetamide, tetrabutylphosphonium<sup>+</sup>, and ethylene glycol). In amino acids, orange represents C atoms, red represents O atoms, and blue represents N atoms, while in DES molecules, green represents C atoms, red represents O atoms, and white represents P atom. Hydrogen bonding forces are formed at distances less than 3.5 Å.

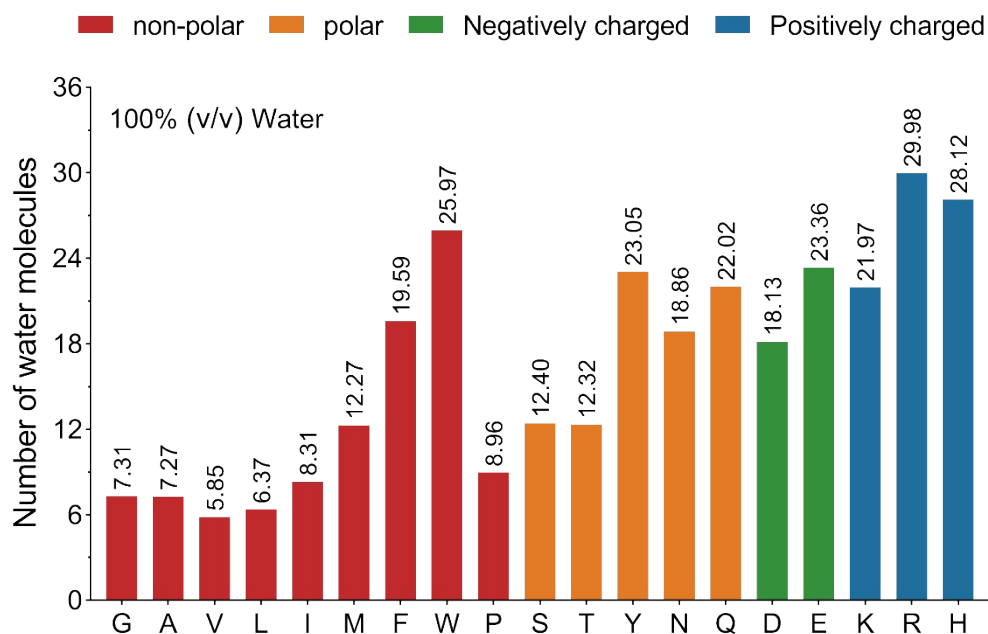

**Figure S19.** The number of water molecules around each amino acid type at the surface of BSLA WT in 100% water simulation system. The data were obtained from the average of three simulations. Red represents non-polar amino acids, orange represents polar amino acids, green represents negatively charged amino acids, and blue represents positively charged amino acids.

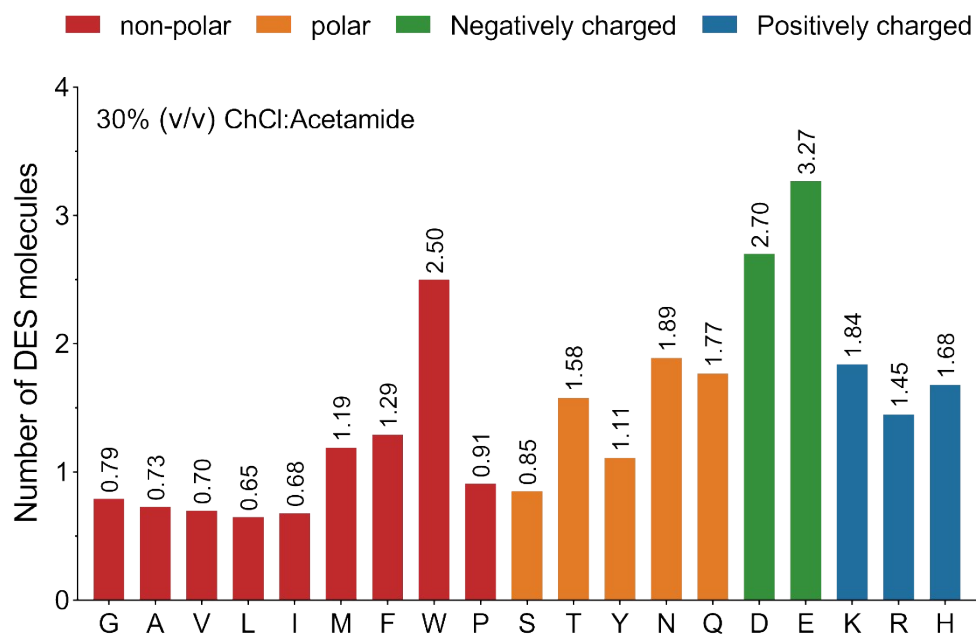

**Figure S20.** The number of DES molecules around each amino acid type at the surface of BSLA WT in 30% ChCl:Acetamide (1:2) simulation system. The data were obtained from the average of three simulations. Red represents non-polar amino acids, orange represents polar amino acids, green represents negatively charged amino acids, and blue represents positively charged amino acids.

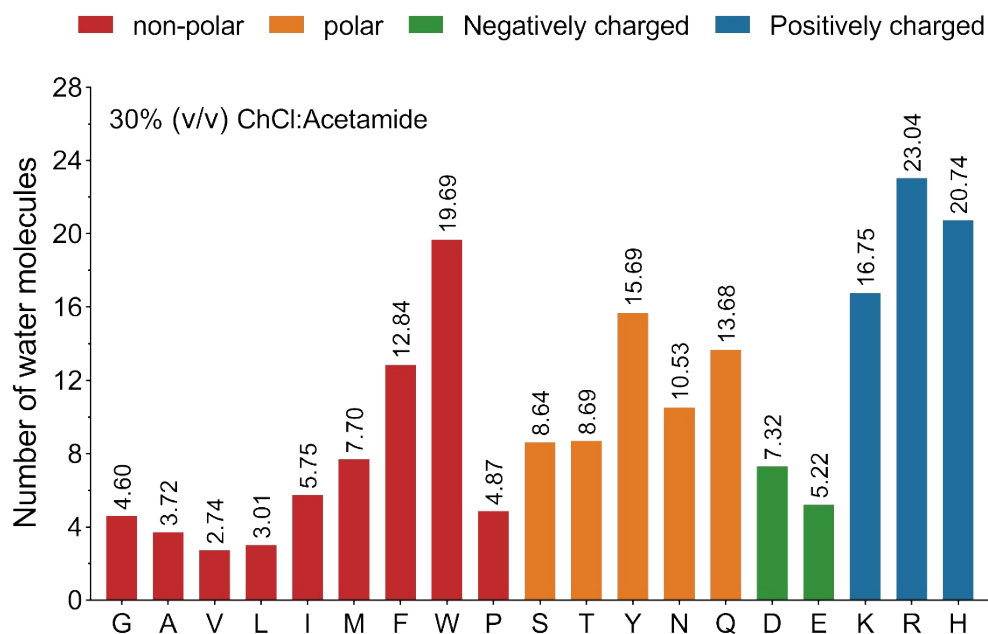

**Figure S21.** The number of water molecules around each amino acid type at the surface of BSLA WT in 30% ChCl:Acetamide (1:2) simulation system. The data were obtained from the average of three simulations. Red represents non-polar amino acids, orange represents polar amino acids, green represents negatively charged amino acids, and blue represents positively charged amino acids.

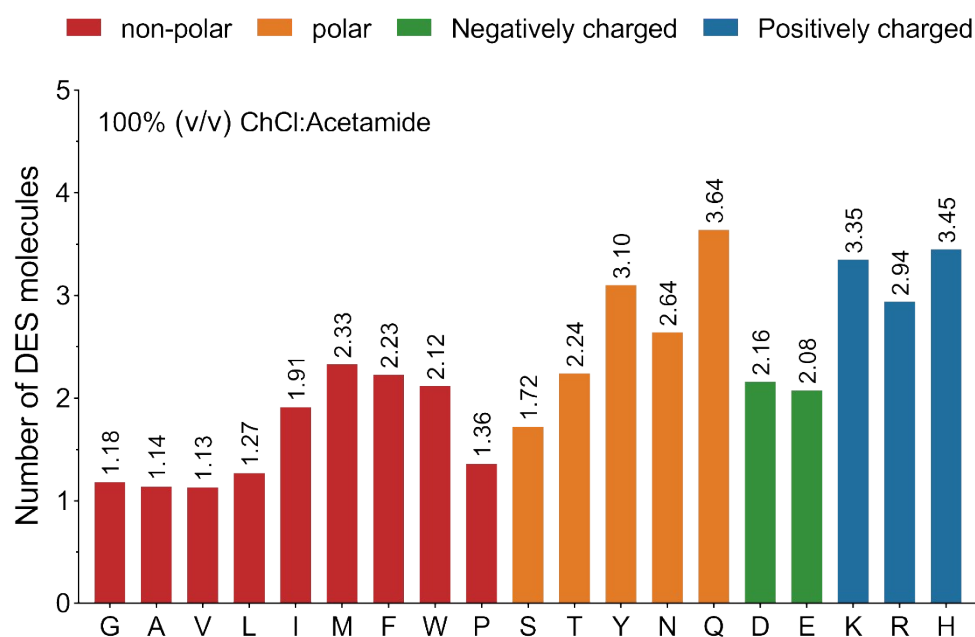

**Figure S22.** The number of DES molecules around each amino acid type at the surface of BSLA WT in 100% (v/v) ChCl:Acetamide (1:2) simulation system. The data were obtained from the average of three simulations. Red represents non-polar amino acids, orange represents polar amino acids, green represents negatively charged amino acids, and blue represents positively charged amino acids.

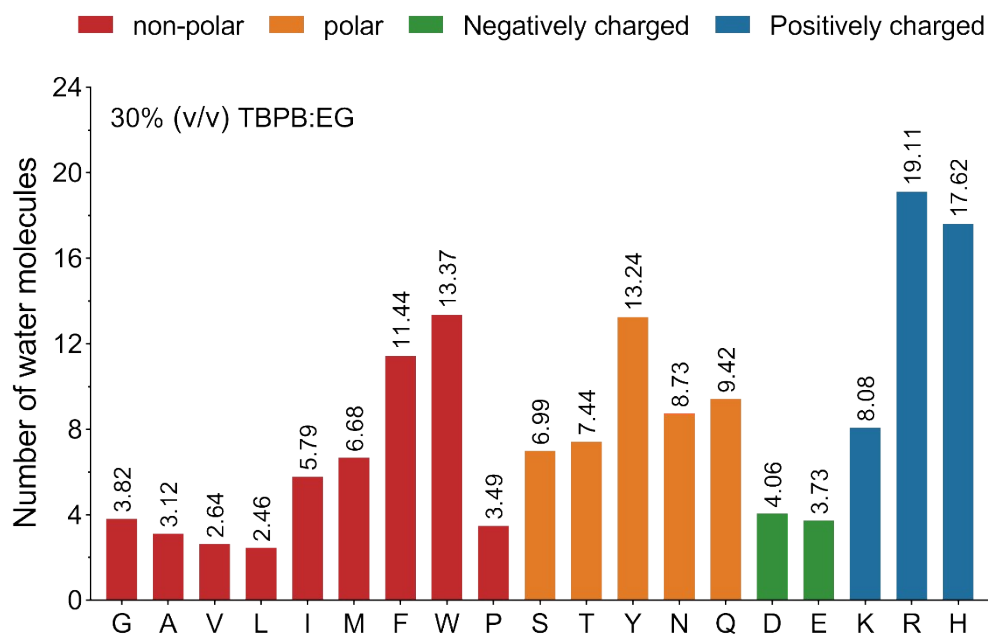

**Figure S23.** The number of water molecules around each amino acid type at the surface of BSLA WT in 30% (v/v) TBPB:EG (1:2) simulation system. The data were obtained from the average of three simulations. Red represents non-polar amino acids, orange represents polar amino acids, green represents negatively charged amino acids, and blue represents positively charged amino acids.

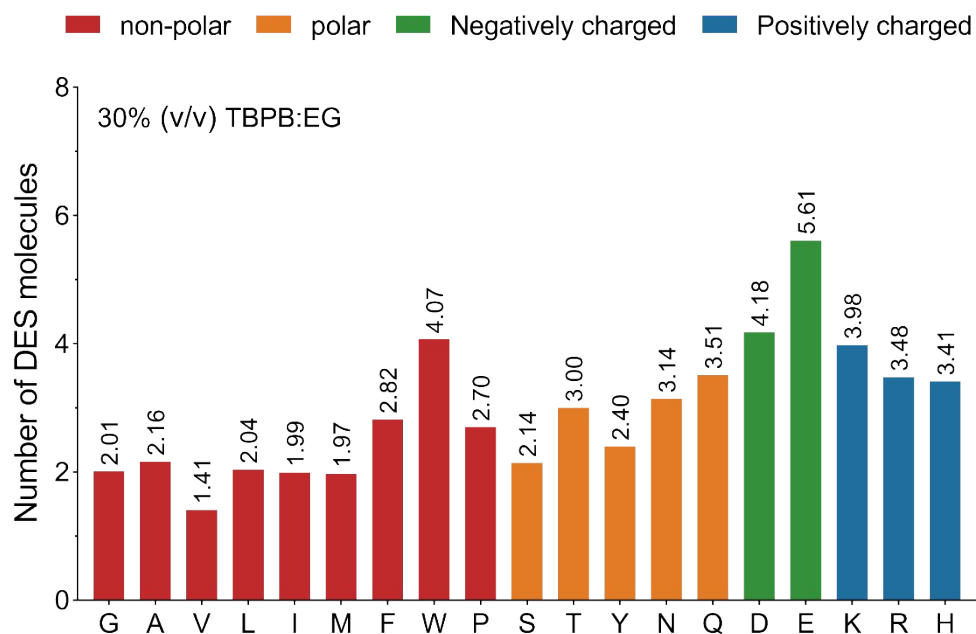

**Figure S24.** The number of DES molecules around each amino acid type at the surface of BSLA WT in 30% (v/v) TBPB:EG (1:2) simulation system. The data were obtained from the average of three simulations. Red represents non-polar amino acids, orange represents polar amino acids, green represents negatively charged amino acids, and blue represents positively charged amino acids.

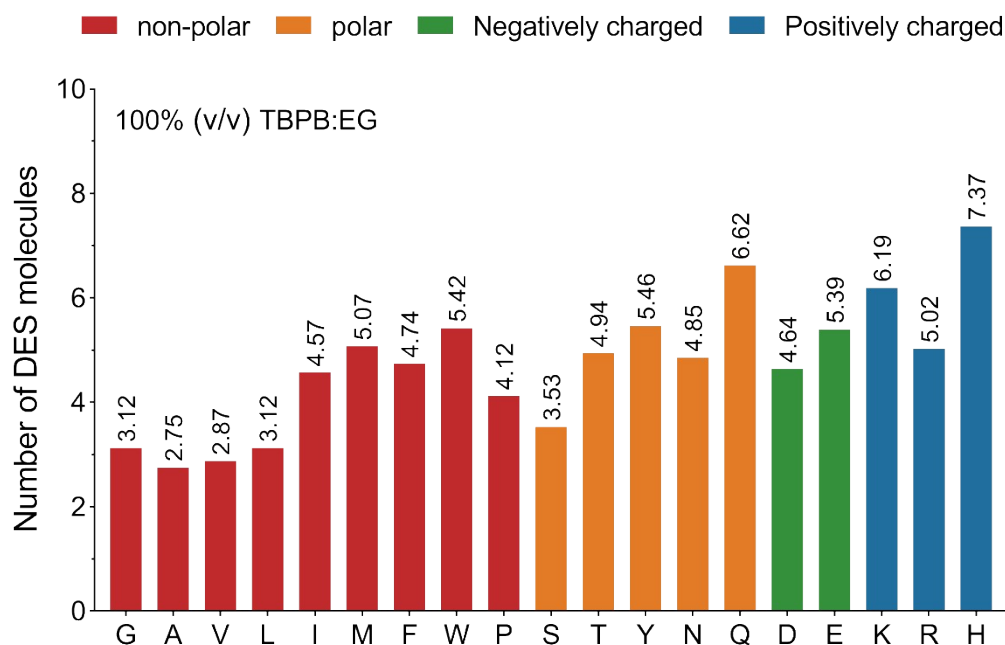

**Figure S25.** The number of DES molecules around each amino acid type at the surface of BSLA WT in 100% (v/v) TBPB:EG (1:2) simulation system. The data were obtained from the average of three simulations. Red represents non-polar amino acids, orange represents polar amino acids, green represents negatively charged amino acids, and blue represents positively charged amino acids.

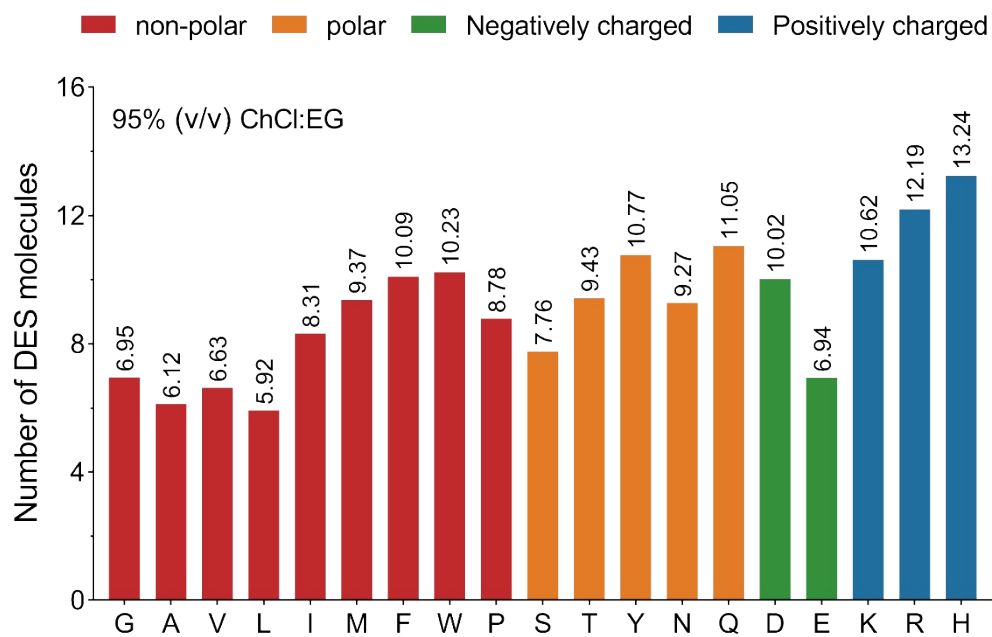

**Figure S26.** The number of DES molecules around each amino acid type at the surface of BSLA WT in 95% (v/v) ChCl:EG (1:2) simulation system. The data were obtained from the average of three simulations. Red represents non-polar amino acids, orange represents polar amino acids, green represents negatively charged amino acids, and blue represents positively charged amino acids.

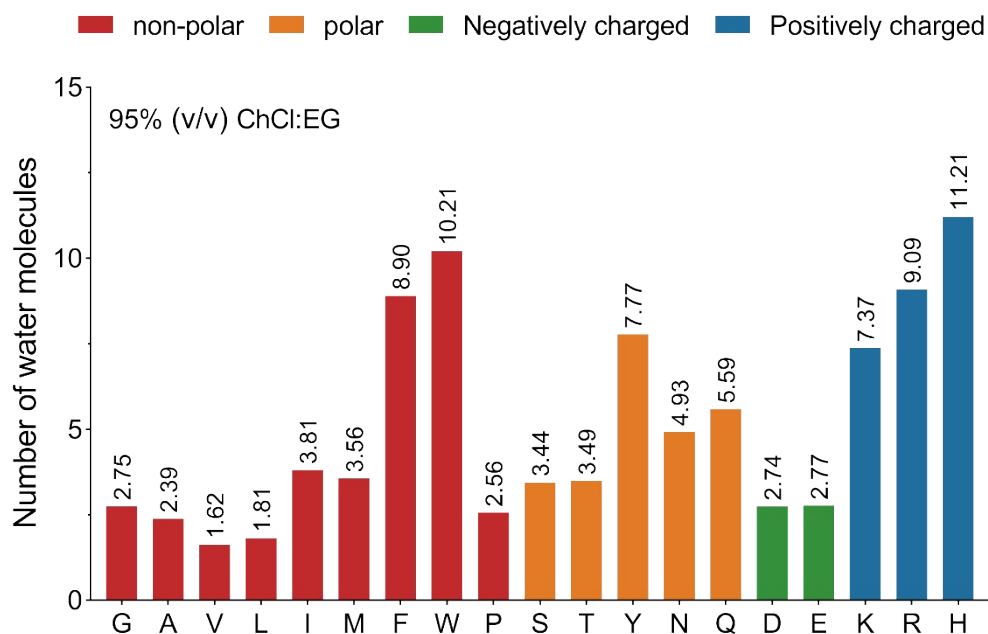

**Figure S27.** The number of water molecules around each amino acid type at the surface of BSLA WT in 95% (v/v) ChCl:EG (1:2) simulation system. The data were obtained from the average of three simulations. Red represents non-polar amino acids, orange represents polar amino acids, green represents negatively charged amino acids, and blue represents positively charged amino acids.

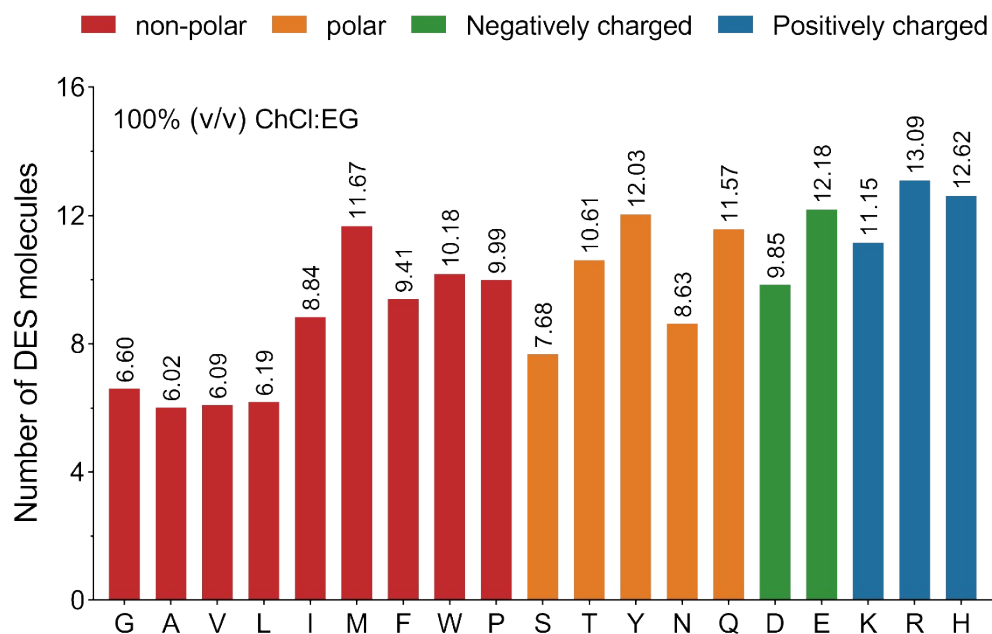

**Figure S28.** The number of DES molecules around each amino acid type at the surface of BSLA WT in 100% (v/v) ChCl:EG (1:2) simulation system. The data were obtained from the average of three simulations. Red represents non-polar amino acids, orange represents polar amino acids, green represents negatively charged amino acids, and blue represents positively charged amino acids.

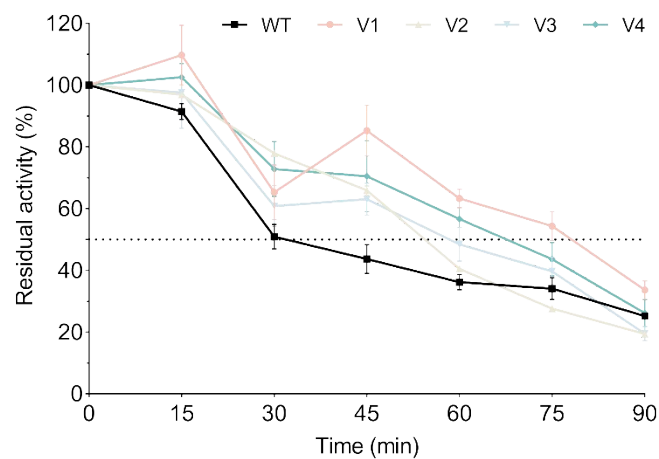

**Figure S29.** The residual activity of BSLA variants at 50°C as a function of time. Residual activity in buffer at the starting point was defined as 100%. The data were obtained from the average of at least three experiments. V1 (D64H/R142L), V2 (R107L/E171Y), V3 (D64H/R107L/E171Y), and V4 (D64H/R142L/E171Y).

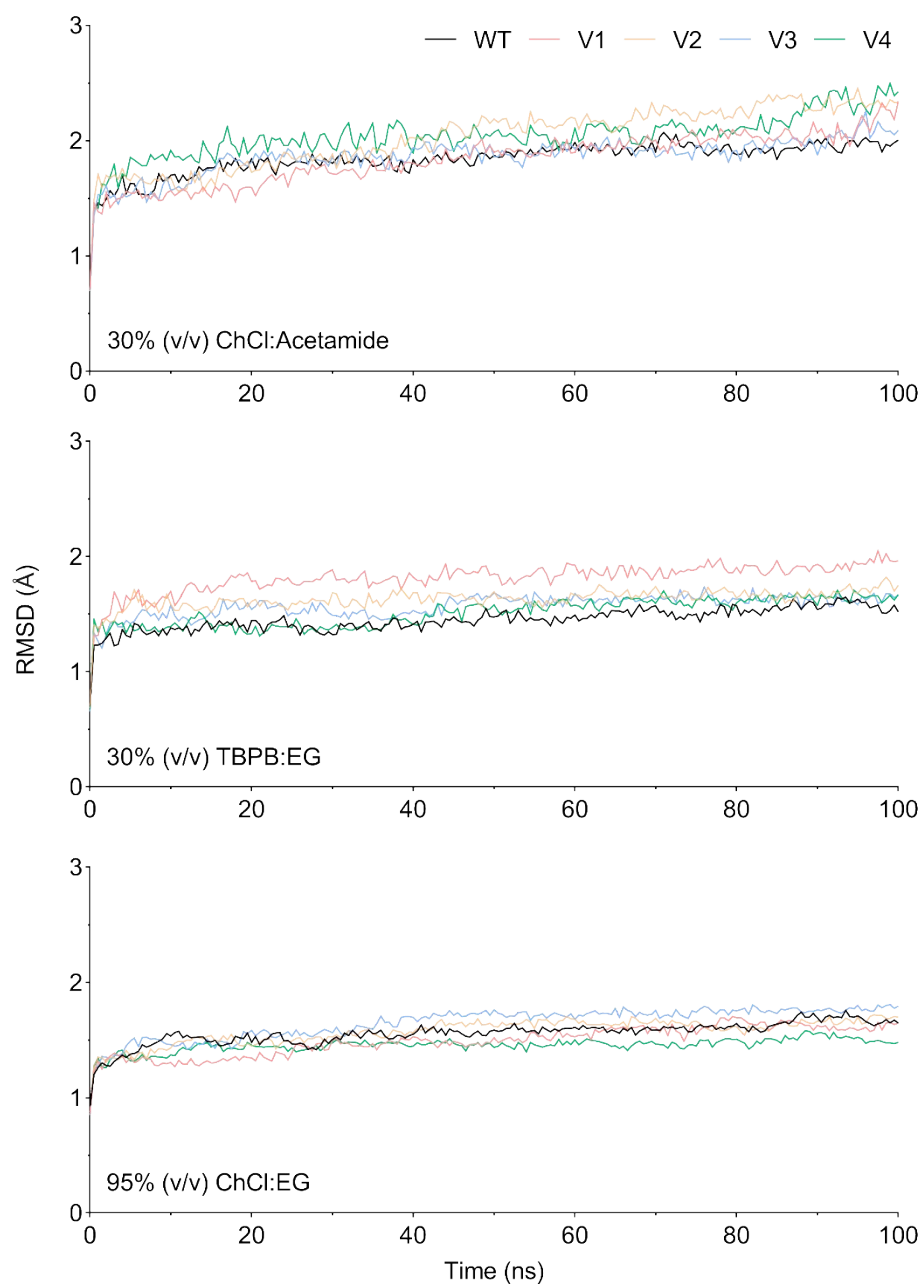

**Figure S30.** Root-mean-square deviation (RMSD) of the BSLA backbone with respect to the initial structure as a function of time in 30% (v/v) ChCl:Acetamide (1:2), 30% (v/v) TBPB:EG (1:2) and 95% (v/v) ChCl:EG (1:2). The RMSD value was average from three independent MD runs. V1 (D64H/R142L), V2 (R107L/E171Y), V3 (D64H/R107L/E171Y), and V4 (D64H/R142L/E171Y).

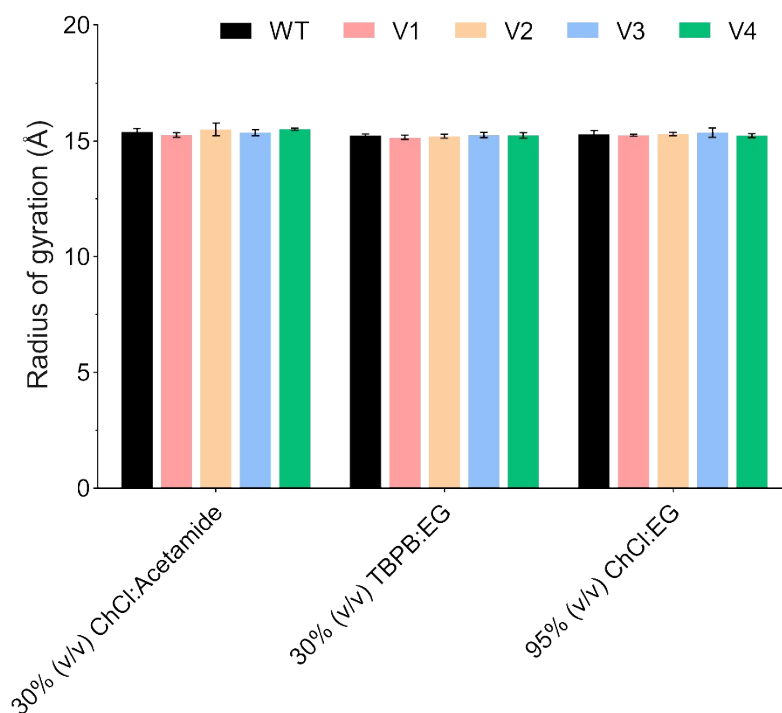

**Figure S31.** The time-averaged radius of gyration ( $R_g$ ) of BSLA variants in 30% (v/v) ChCl:Acetamide (1:2), 30% (v/v) TBPB:EG (1:2) and 95% (v/v) ChCl:EG (1:2). The time-averaged  $R_g$  was calculated from the last 40 ns of the MD simulations. Error bars show the standard deviation from three independent MD runs. V1 (D64H/R142L), V2 (R107L/E171Y), V3 (D64H/R107L/E171Y), and V4 (D64H/R142L/E171Y).

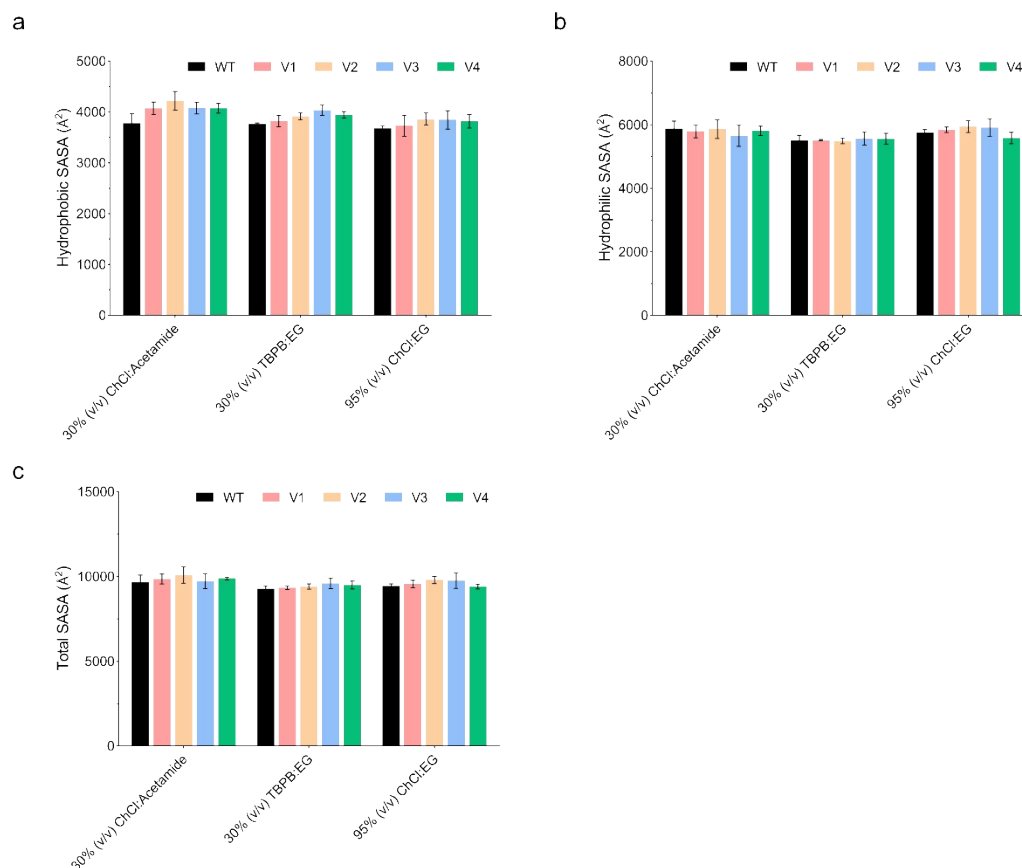

**Figure S32.** The time-averaged SASA of BSLA variants. (a) Hydrophobic SASA, (b) Hydrophilic SASA, and (c) Total SASA of BSLA variants in 30% (v/v) ChCl:Acetamide (1:2), 30% (v/v) TBPB:EG (1:2) and 95% (v/v) ChCl:EG (1:2). The time-averaged SASA was calculated from the last 40 ns of the MD simulations. Error bars show the standard deviation from three independent MD runs. V1 (D64H/R142L), V2 (R107L/E171Y), V3 (D64H/R107L/E171Y), and V4 (D64H/R142L/E171Y).

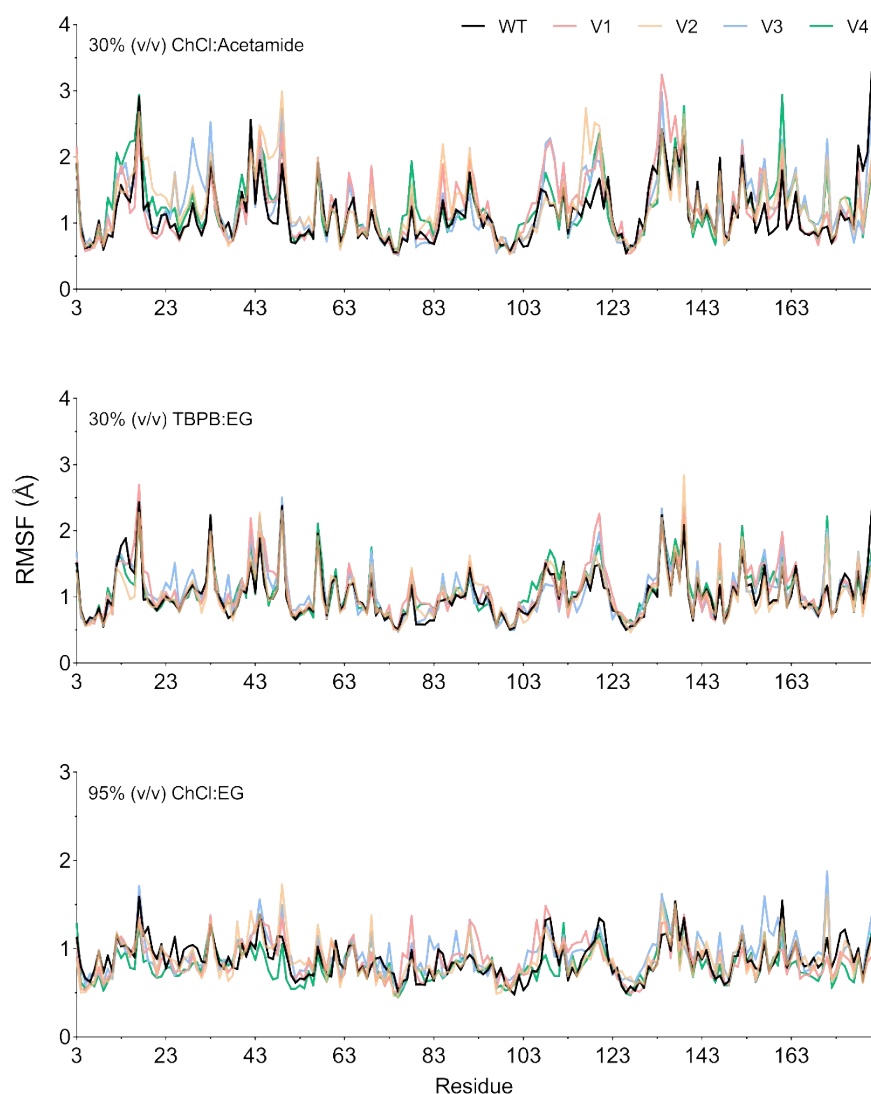

**Figure S33.** RMSF of BSLA variants in 30% (v/v) ChCl:Acetamide (1:2), 30% (v/v) TBPB:EG (1:2) and 95% (v/v) ChCl:EG (1:2) averaged over the last 40 ns of MD trajectories. The value average from three independent MD runs. V1 (D64H/R142L), V2 (R107L/E171Y), V3 (D64H/R107L/E171Y), and V4 (D64H/R142L/E171Y).

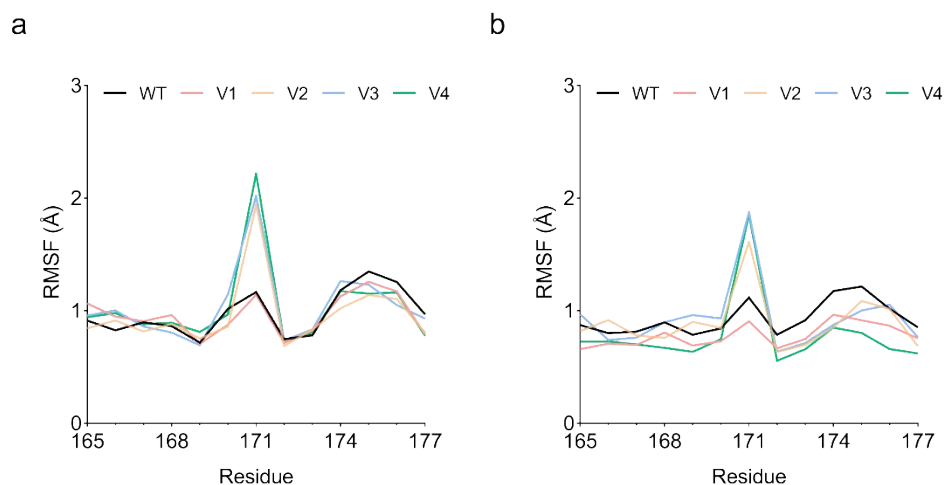

**Figure S34.** Local RMSF of BSLA variants in (a) 30% (v/v) TBPB:EG (1:2) and (b) 95% (v/v) ChCl:EG (1:2) averaged over the last 40 ns of MD trajectories. The value average from three independent MD runs. V1 (D64H/R142L), V2 (R107L/E171Y), V3 (D64H/R107L/E171Y), and V4 (D64H/R142L/E171Y).

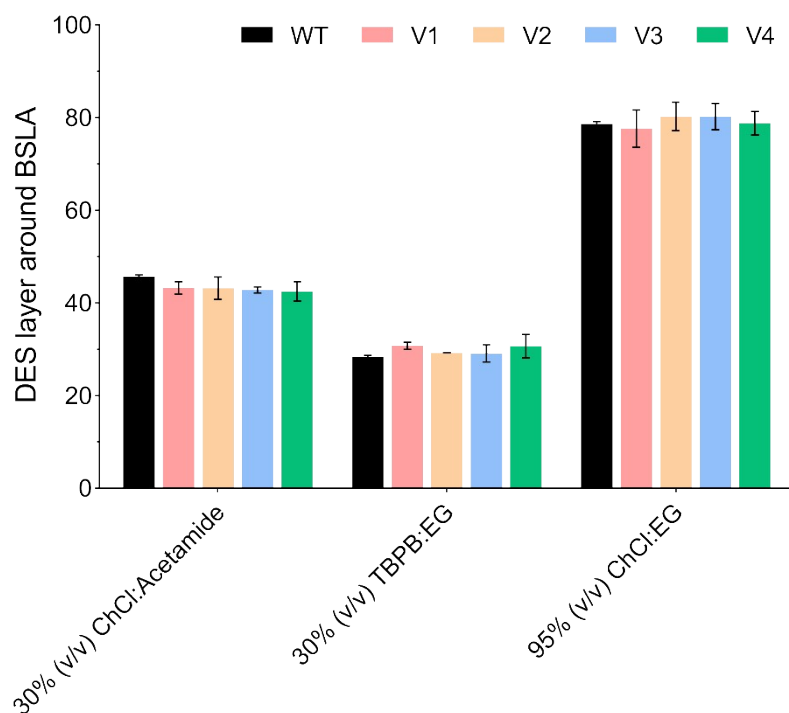

**Figure S35.** DES layer around BSLA variants in 30% (v/v) ChCl:Acetamide (1:2), 30% (v/v) TBPB:EG (1:2) and 95% (v/v) ChCl:EG (1:2) averaged over the last 40 ns of MD trajectories. Error bars show the standard deviation from three independent MD runs. V1 (D64H/R142L), V2 (R107L/E171Y), V3 (D64H/R107L/E171Y), and V4 (D64H/R142L/E171Y).

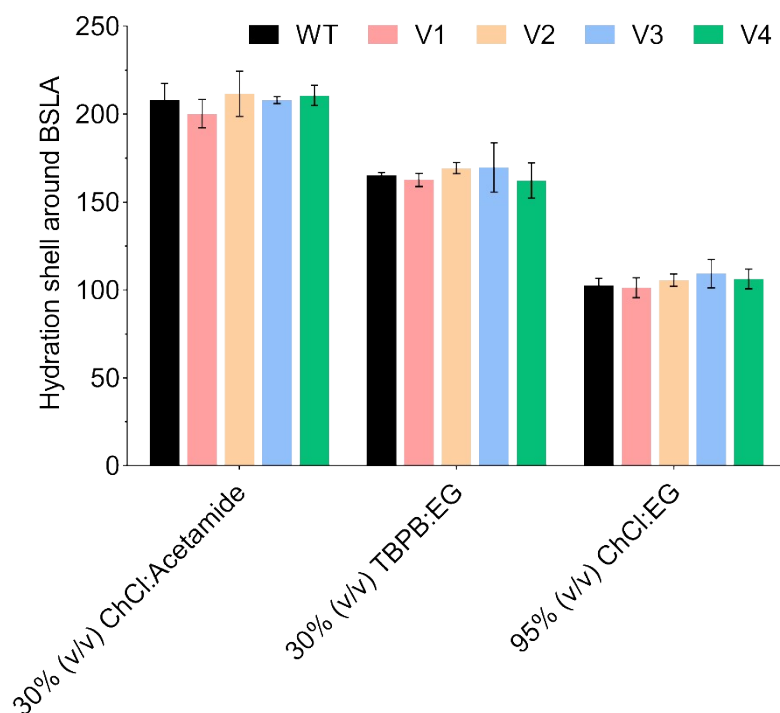

**Figure S36.** Hydration shell around BSLA variants in 30% (v/v) ChCl:Acetamide (1:2), 30% (v/v) TBPB:EG (1:2) and 95% (v/v) ChCl:EG (1:2) averaged over the last 40 ns of MD trajectories. Error bars show the standard deviation from three independent MD runs. V1 (D64H/R142L), V2 (R107L/E171Y), V3 (D64H/R107L/E171Y), and V4 (D64H/R142L/E171Y).

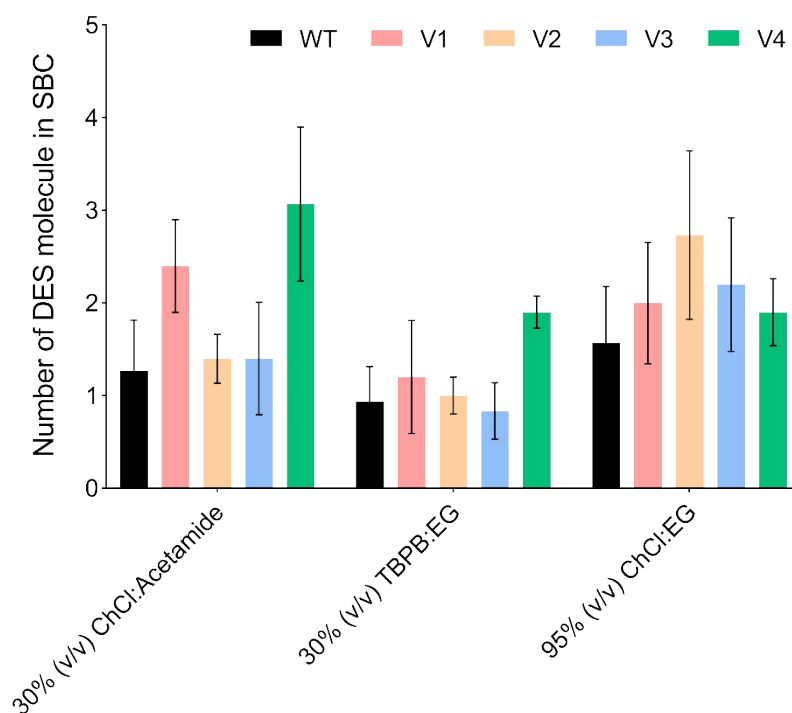

**Figure S37.** The number of DES molecule in substrate binding cleft (SBC) of BSLA variants in 30% (v/v) ChCl:Acetamide (1:2), 30% (v/v) TBPB:EG (1:2) and 95% (v/v) ChCl:EG (1:2) averaged over the last 40 ns of MD simulations. Error bars show the standard deviation from three independent MD runs. V1 (D64H/R142L), V2 (R107L/E171Y), V3 (D64H/R107L/E171Y), and V4 (D64H/R142L/E171Y).

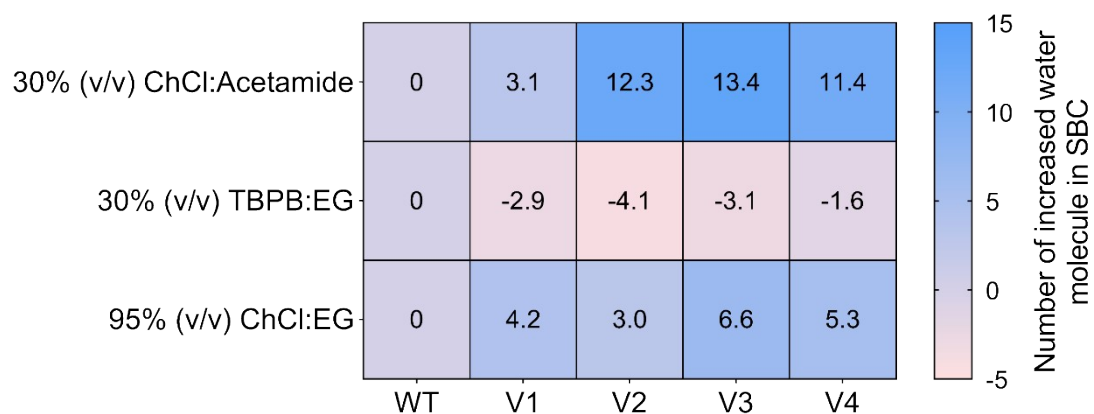

**Figure S38.** The number of increased water molecules in substrate binding cleft (SBC) of BSLA variants in 30% (v/v) ChCl:Acetamide (1:2), 30% (v/v) TBPB:EG (1:2) and 95% (v/v) ChCl:EG (1:2) averaged over the last 40 ns of MD simulations. The value average from three independent MD runs. V1 (D64H/R142L), V2 (R107L/E171Y), V3 (D64H/R107L/E171Y), and V4 (D64H/R142L/E171Y).

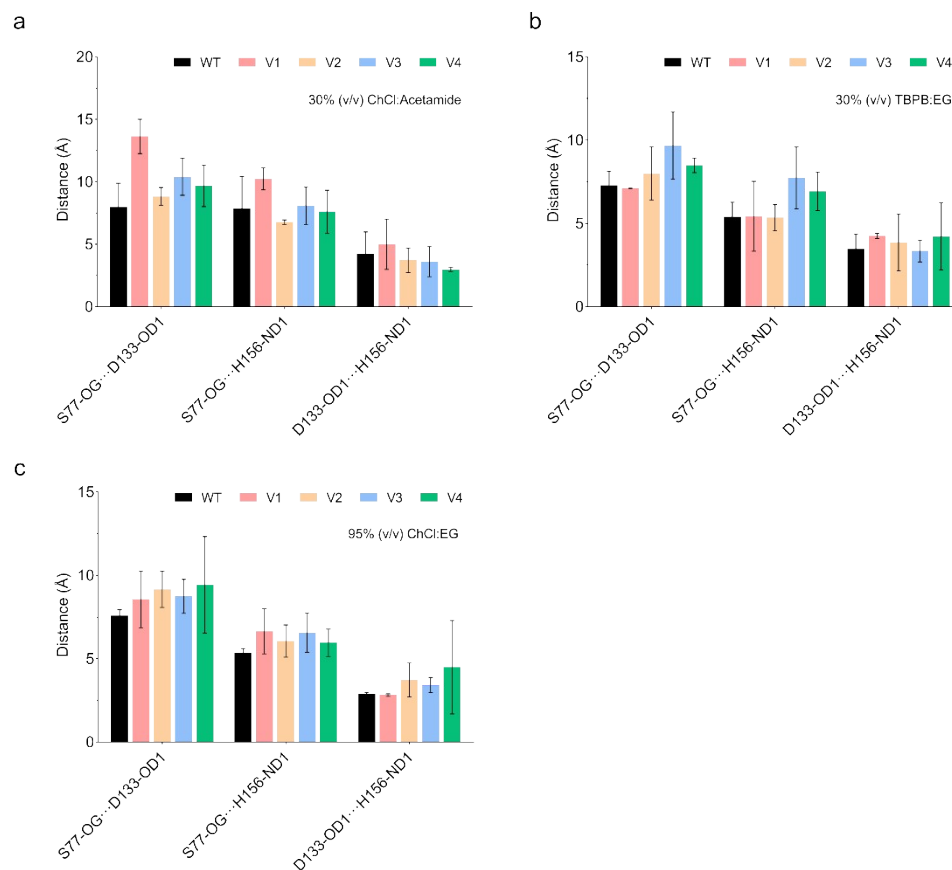

**Figure S39.** Distance of active site of BSLA variants. Distance (OG atom of Ser 77, OD1 atom of Asp 133, and ND1 atom of His 156) of BSLA variants in (a) 30% (v/v) ChCl:Acetamide (1:2), (b) (v/v) 30% TBPB:EG (1:2), and (c) 95% (v/v) ChCl:EG (1:2) averaged over the last 40 ns of MD simulations. Error bars show the standard deviation from three independent MD runs. V1 (D64H/R142L), V2 (R107L/E171Y), V3 (D64H/R107L/E171Y), and V4 (D64H/R142L/E171Y).

1. P. Liu, J.-W. Hao, L.-P. Mo and Z.-H. Zhang, *RSC Adv.*, 2015, **5**, 48675-48704.
2. H. Cui, L. Eltoukhy, L. Zhang, U. Markel, K.-E. Jaeger, M. D. Davari and U. Schwaneberg, *Angew. Chem. Int. Ed.*, 2021, **60**, 11448-11456.
3. M. Wang, Y. Sheng, H. Cui, A. Li, X. Li and H. Huang, *ACS Sustain. Chem. Eng.*, 2022, **10**, 15175-15185.
4. H. Cui, L. Zhang, L. Eltoukhy, Q. Jiang, S. K. Korkunc, K.-E. Jaeger, U. Schwaneberg and M. D. Davari, *ACS Catal.*, 2020, **10**, 14847-14856.
5. G. van Pouderoyen, T. Eggert, K. E. Jaeger and B. W. Dijkstra, *J. Mol. Biol.*, 2001, **309**, 215-226.
6. J. Qiao, Y. Sheng, M. Wang, A. Li, X. Li and H. Huang, *Angew. Chem. Int. Ed.*, 2023.
7. H. Cui, T. H. J. Stadtmueller, Q. Jiang, K.-E. Jaeger, U. Schwaneberg and M. D. Davari, *Chemcatchem*, 2020, **12**, 4073-4083.
8. X. Wang, Y. Sheng, H. Cui, J. Qiao, Y. Song, X. Li and H. Huang, *Angew. Chem. Int. Ed.*, 2023.
9. A. K. Malde, L. Zuo, M. Breeze, M. Stroet, D. Poger, P. C. Nair, C. Oostenbrink and A. E. Mark, *J. Chem. Theory Comput.*, 2011, **7**, 4026-4037.
10. P. Mark and L. Nilsson, *J. Phys. Chem. B*, 2001, **105**, 24A-24A.
11. H. Cui, L. Zhang, D. Soeder, X. Tang, M. D. Davari and U. Schwaneberg, *ACS Catal.*, 2021, **11**, 2445-2453.
12. X. Li, M. Wang, J. Qiao and H. Huang, *ACS Sustain. Chem. Eng.*, 2021, **9**, 14277-14287.
13. T. Makarewicz and R. Kazmierkiewicz, *J. Chem. Inf. Model.*, 2013, **53**, 1229-1234.
14. W. Humphrey, A. Dalke and K. Schulten, *J. mol. graph.*, 1996, **14**, 33-38, 27-38.
15. D. Van der Spoel, E. Lindahl, B. Hess, G. Groenhof, A. E. Mark and H. J. C. Berendsen, *J. Comput. Chem.*, 2005, **26**, 1701-1718.
